# Supplementary material for: New Alkylpyridinium Anthraquinone, Isocoumarin, C-Glucosyl Resorcinol Derivative and Prenylated Pyranoxanthones from the Culture of a Marine Sponge-Associated Fungus, Aspergillus stellatus KUFA 2017
Source: MDPI journal article supplement (doi:10.3390/md20110672), 2022-10-27
Supplement: s1 [file s1]

# **New Alkylpyridinium Anthraquinone, Isocoumarin, C-Glucosyl Resorcinol Derivative and Prenylated Pyranoxanthenes from the Culture of a Marine Sponge-Associated Fungus, *Aspergillus stellatus* KUFA 2017**

Fátima P. Machado <sup>1,2</sup>, Inês C. Rodrigues <sup>1</sup>, Luís Gales <sup>1,3</sup>, José A. Pereira <sup>1,2</sup>, Paulo M. Costa <sup>1,2</sup>, Tida Dethoup <sup>4</sup>, Sharad Mistry <sup>5</sup>, Artur M. S. Silva <sup>6</sup>, Vitor Vasconcelos <sup>2,7</sup> and Anake Kijjoa <sup>1,2,\*</sup>

<sup>1</sup> ICBAS-Instituto de Ciências Biomédicas Abel Salazar, Rua de Jorge Viterbo Ferreira, 228, 4050-313 Porto, Portugal

<sup>2</sup> Interdisciplinary Centre of Marine and Environmental Research (CIIMAR), Terminal de Cruzeiros do Porto de Leixões, Av. General Norton de Matos s/n, 4450-208 Matosinhos, Portugal

<sup>3</sup> Instituto de Biologia Molecular e Celular (i3S-IBMC), Universidade do Porto, Rua de Jorge Viterbo Ferreira, 228, 4050-313 Porto, Portugal

<sup>4</sup> Department of Plant Pathology, Faculty of Agriculture, Kasetsart University, Bangkok 10240, Thailand

<sup>5</sup> Department of Chemistry, University of Leicester, University Road, Leicester LE 7 RH, UK

<sup>6</sup> Departamento de Química & QOPNA, Universidade de Aveiro, 3810-193 Aveiro, Portugal

<sup>7</sup> FCUP-Faculty of Sciences, University of Porto, Rua do Campo Alegre, s/n, 4169-007 Porto, Portugal

\* Correspondence: ankijjoa@icbas.up.pt; Tel.: +351-962712474; Fax: +351-22-206-2232

**Figure S1.**  $^1\text{H}$  NMR spectrum of **1** ( $\text{CDCl}_3$ , 300MHz).

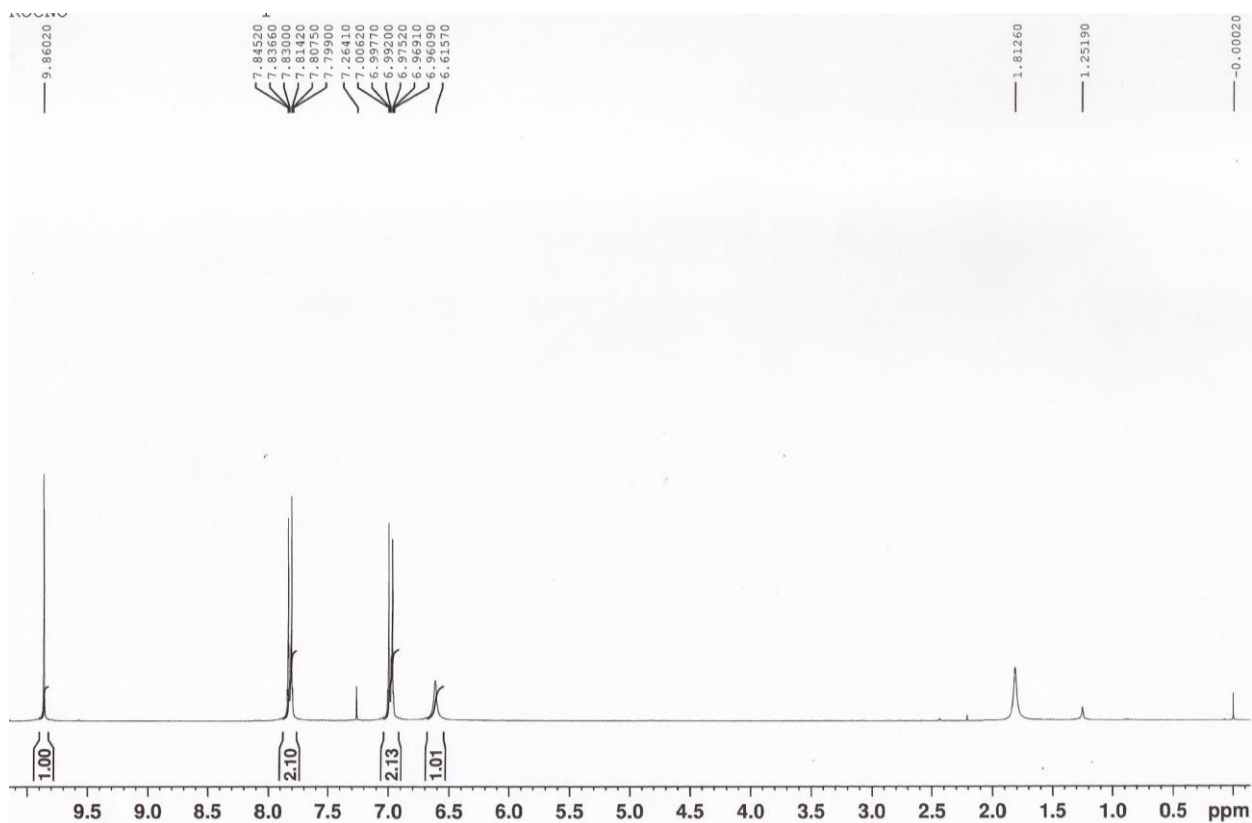

**Figure S2.**  $^{13}\text{C}$  NMR spectrum of **1** ( $\text{CDCl}_3$ , 75 MHz).

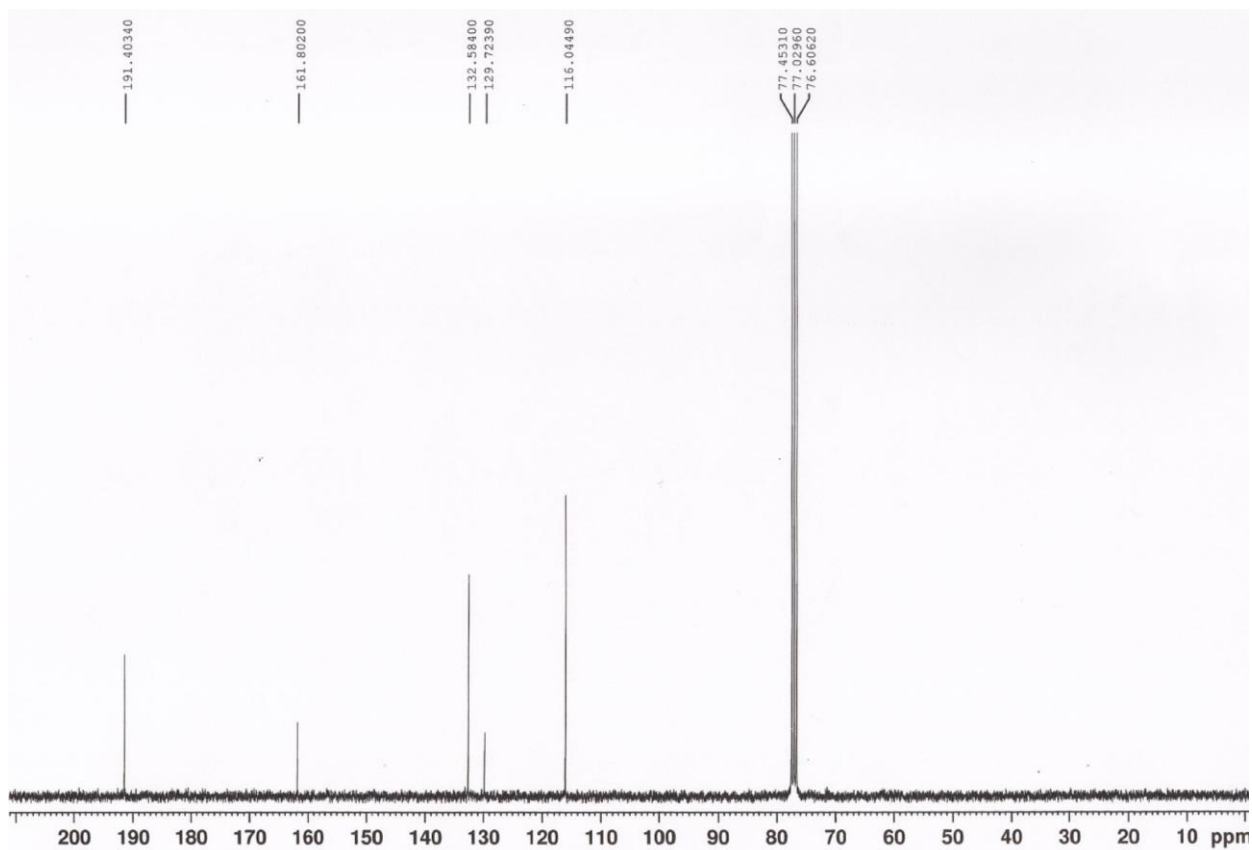

**Figure S3.**  $^1\text{H}$  NMR spectrum of **2** ( $\text{CDCl}_3$ , 300MHz).

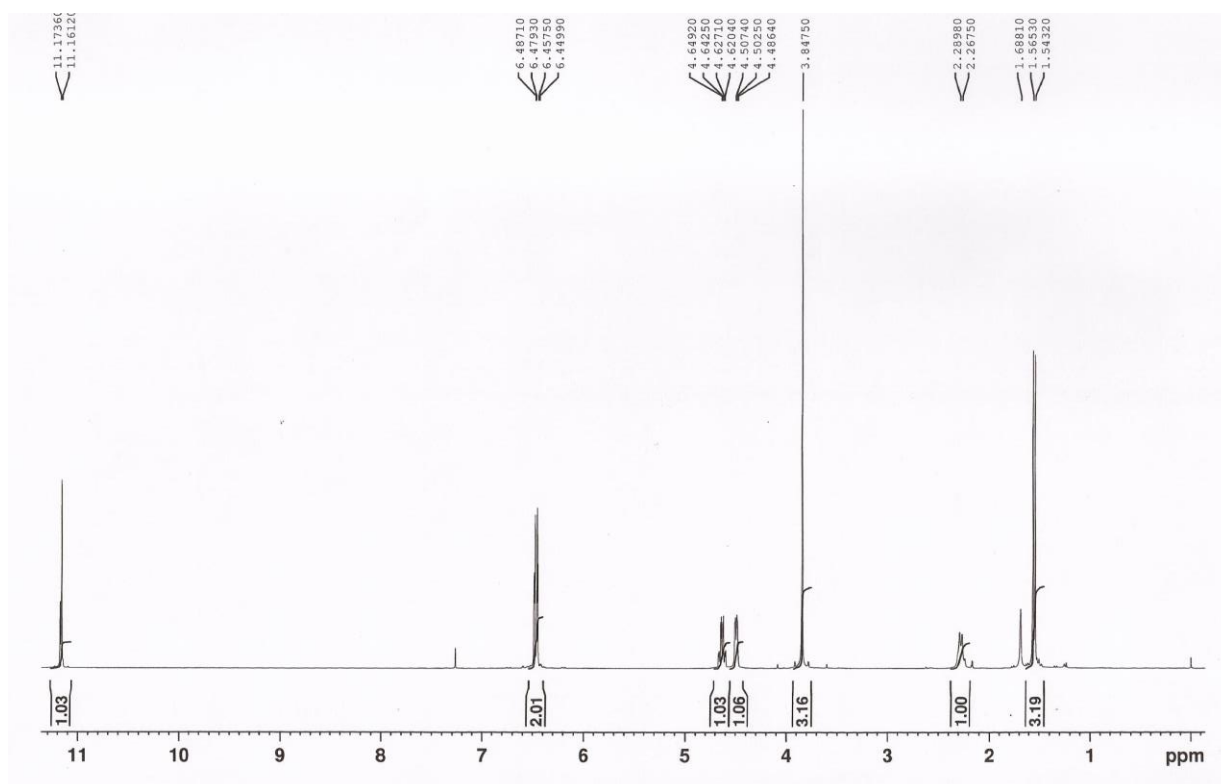

**Figure S4.**  $^{13}\text{C}$  NMR spectrum of **2** ( $\text{CDCl}_3$ , 75 MHz).

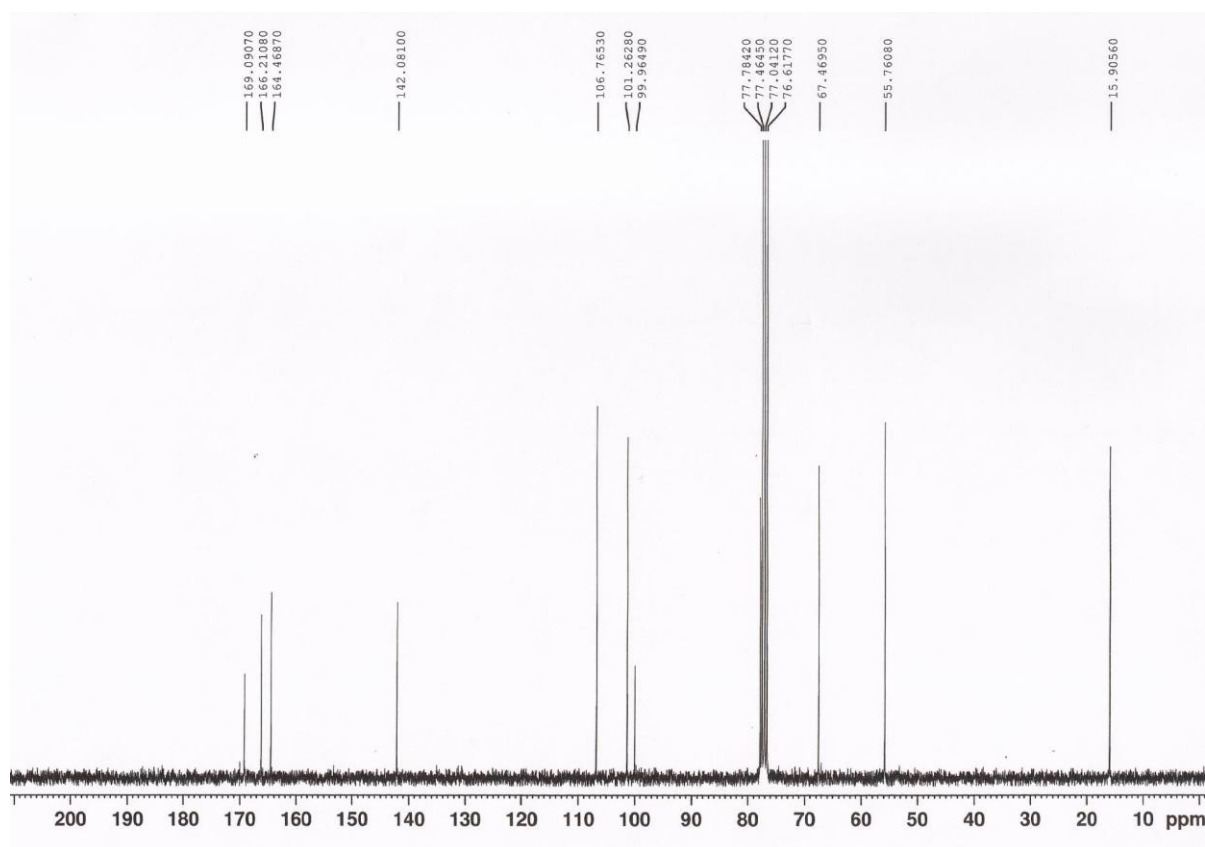

**Figure S5.** COSY spectrum of **2** (CDCl<sub>3</sub>, 300 MHz).

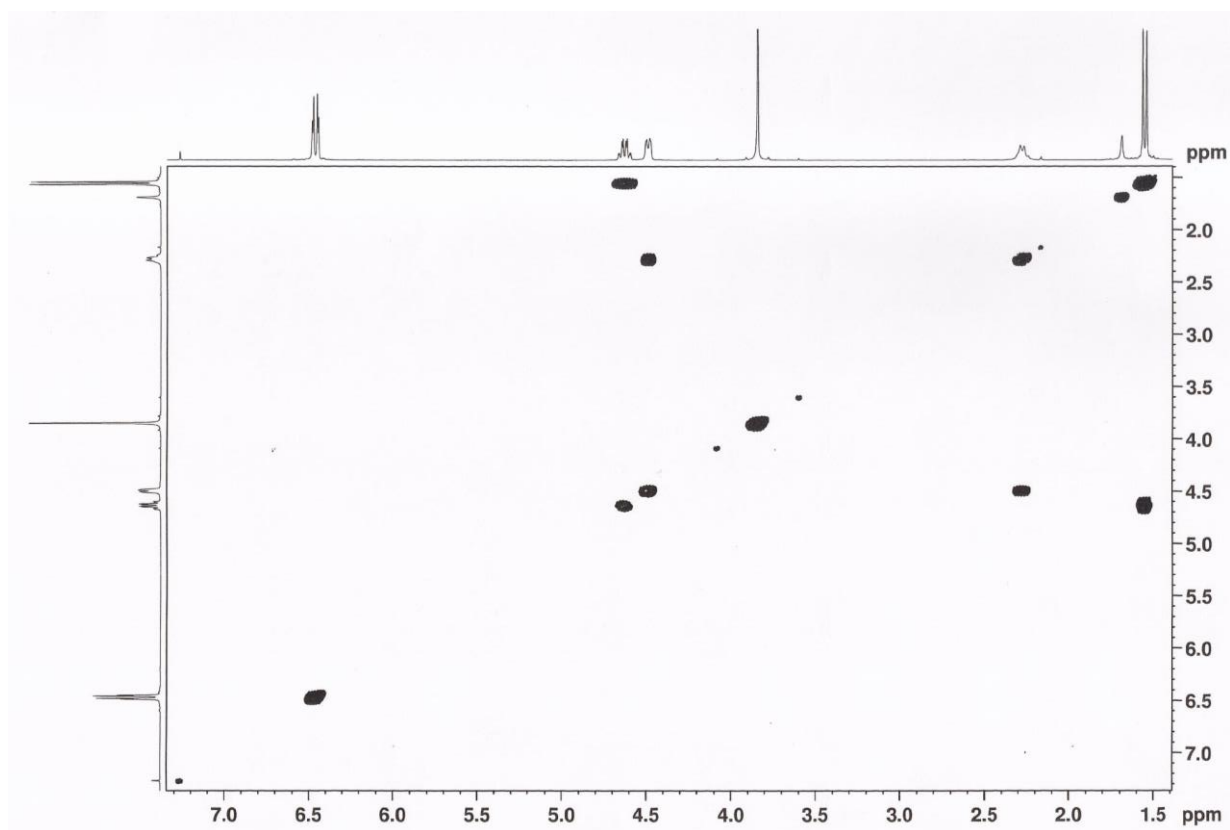

**Figure S6.** HSQC spectrum of **2** (CDCl<sub>3</sub>, 300 MHz).

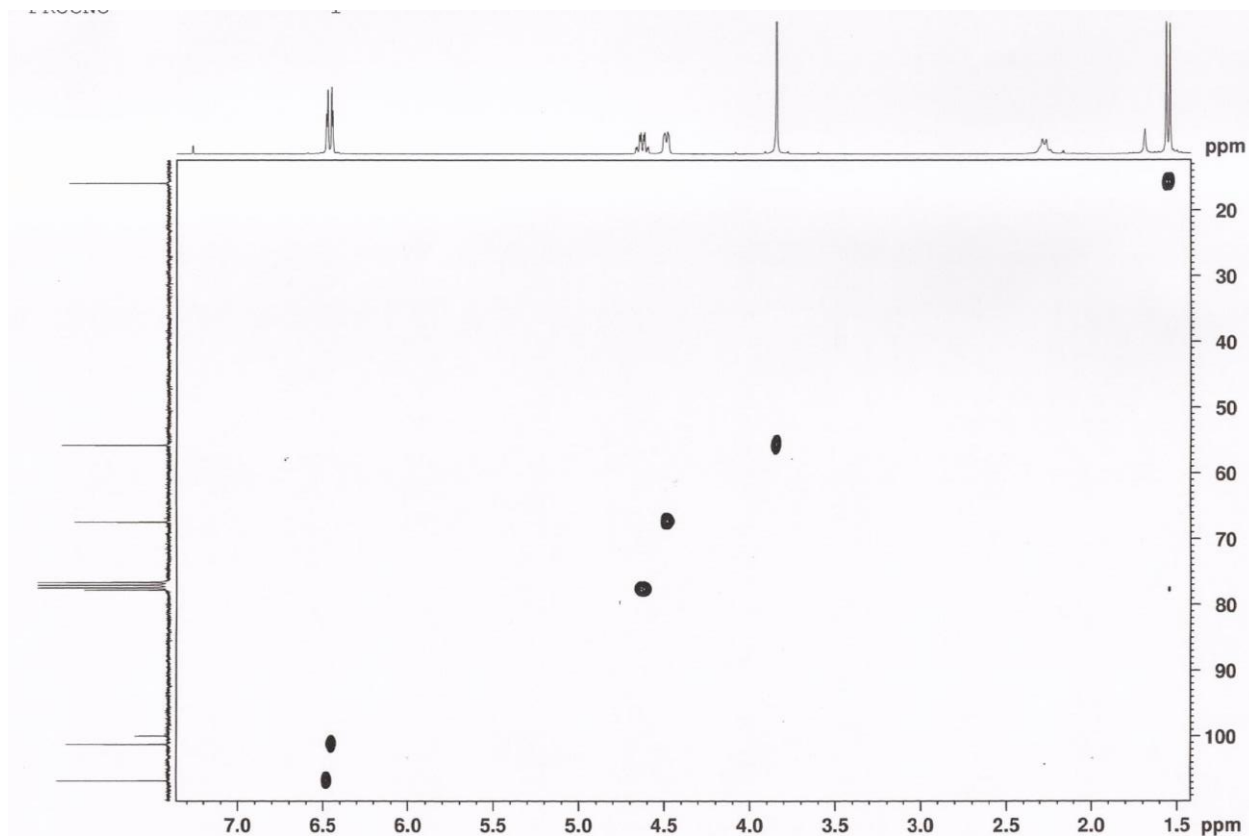

**Figure S7.** HMBC spectrum of **2** (CDCl<sub>3</sub>, 300 MHz).

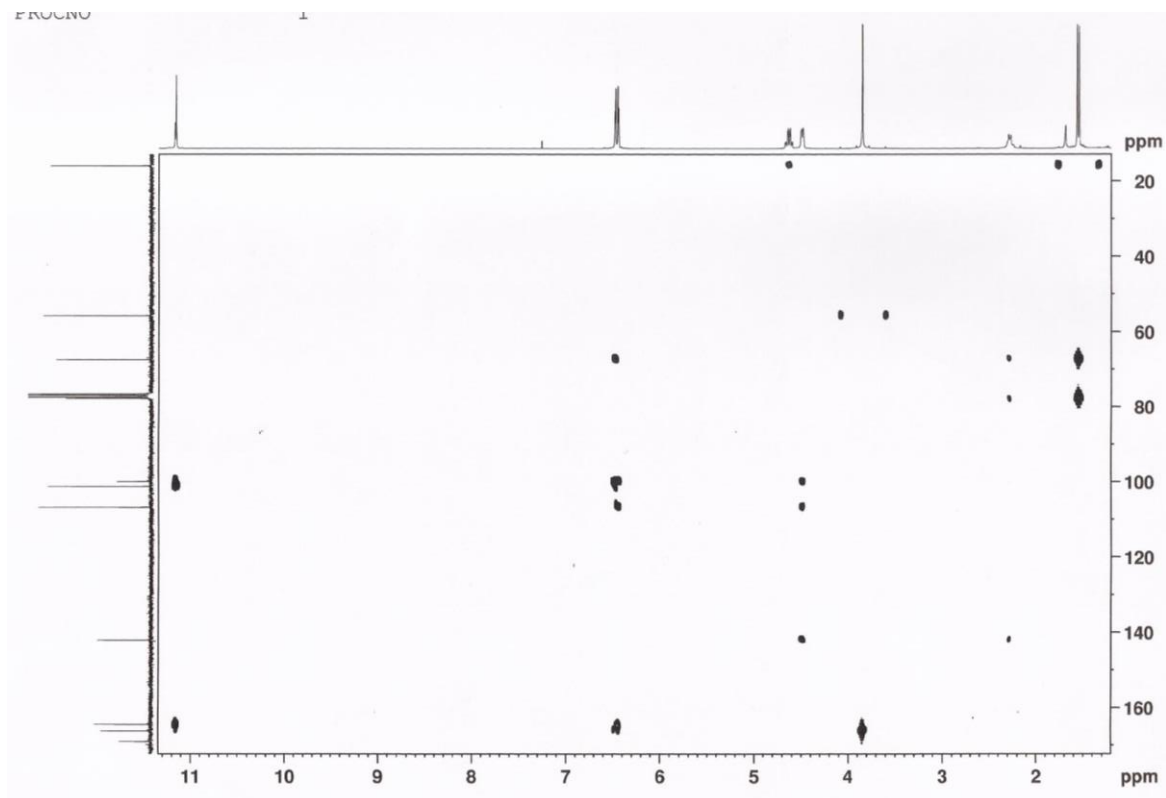

**Figure S8.** NOESY spectrum of **2** (CDCl<sub>3</sub>, 300 MHz).

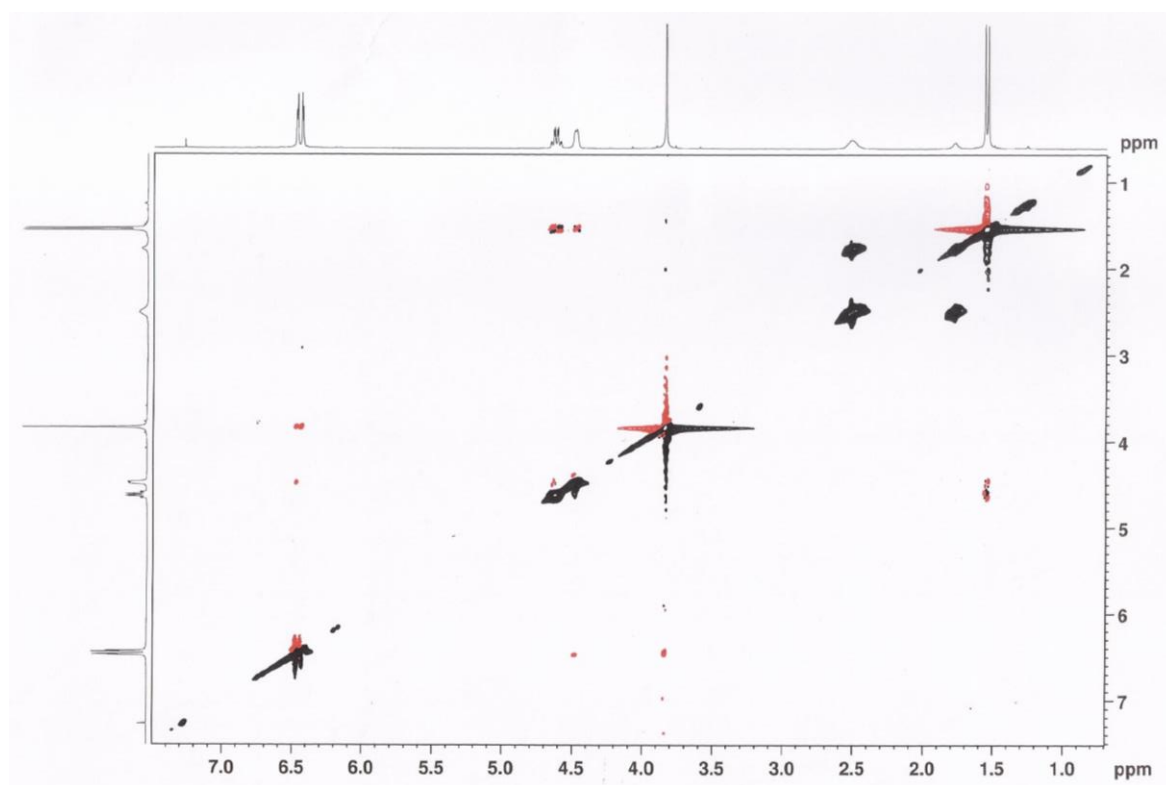

**Figure S9.**  $^1\text{H}$  NMR spectrum of **3a** ( $\text{CDCl}_3$ , 300 MHz)

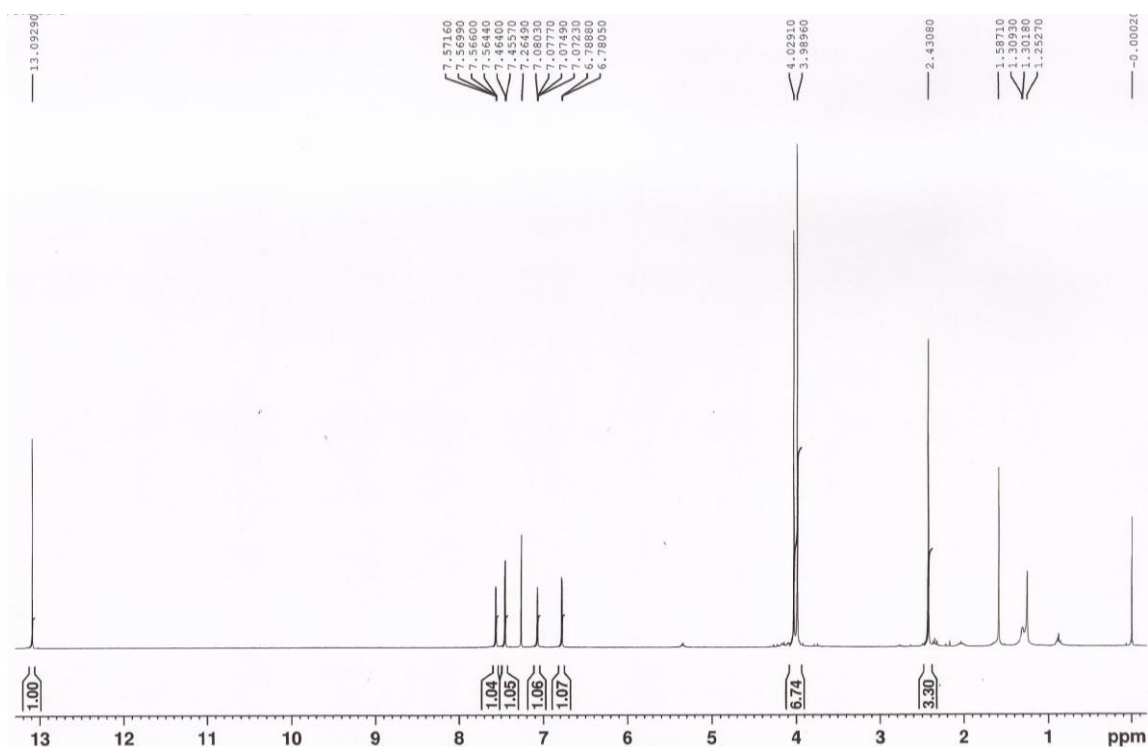

**Figure S10.**  $^{13}\text{C}$  NMR spectrum of **3a** ( $\text{CDCl}_3$ , 75 MHz)

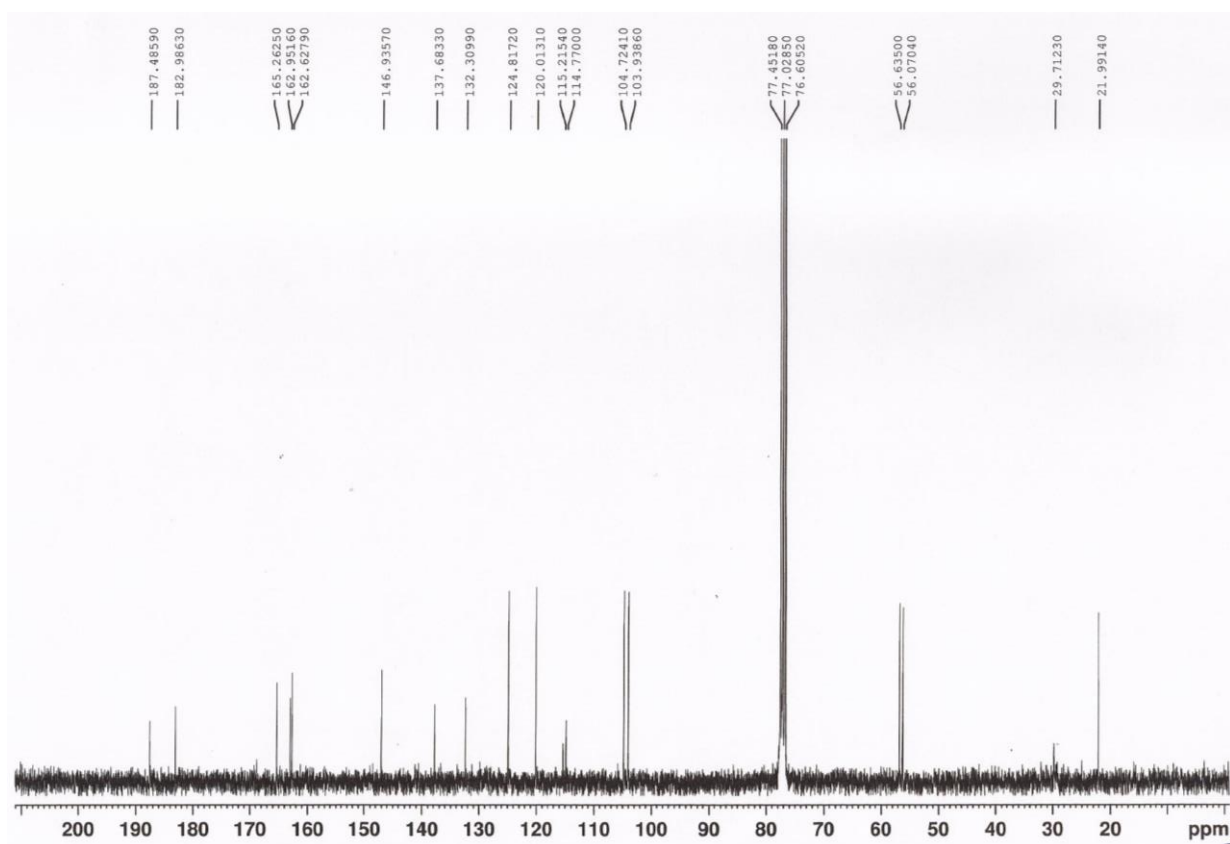

**Figure S 11.** COSY spectrum of **3a** (CDCl<sub>3</sub>, 300 MHz)

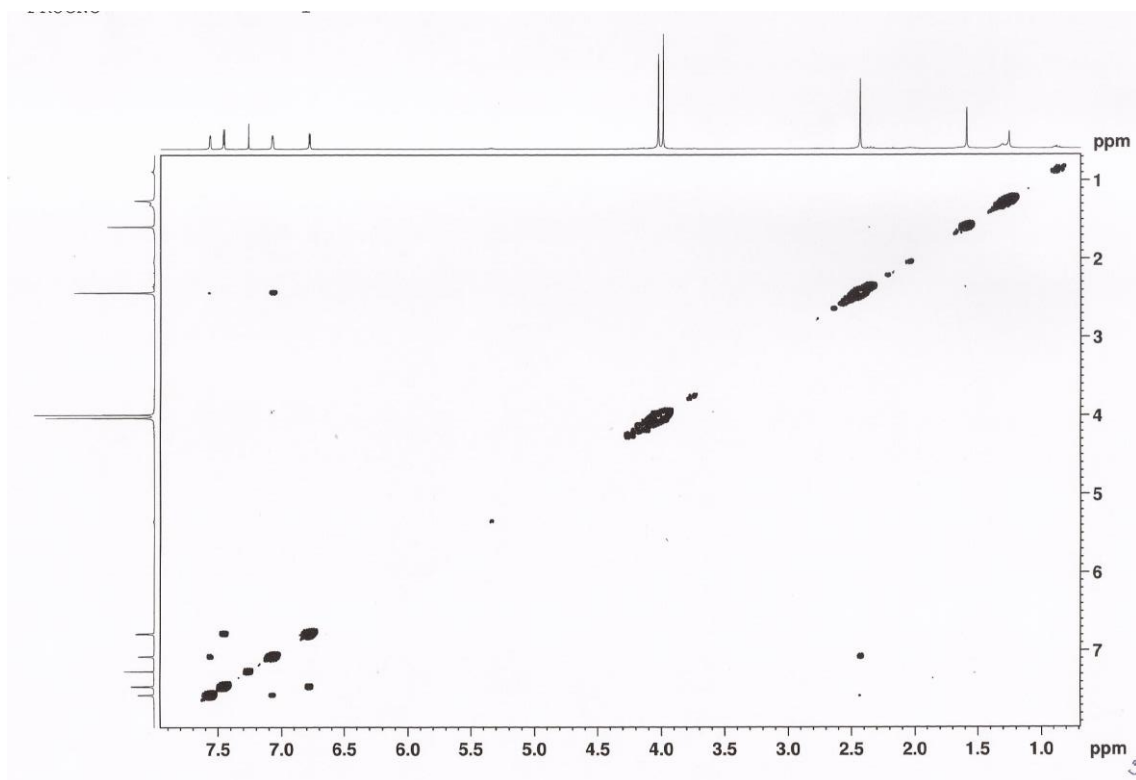

**Figure S12.** HSQC spectrum of **3a** (CDCl<sub>3</sub>, 300 MHz)

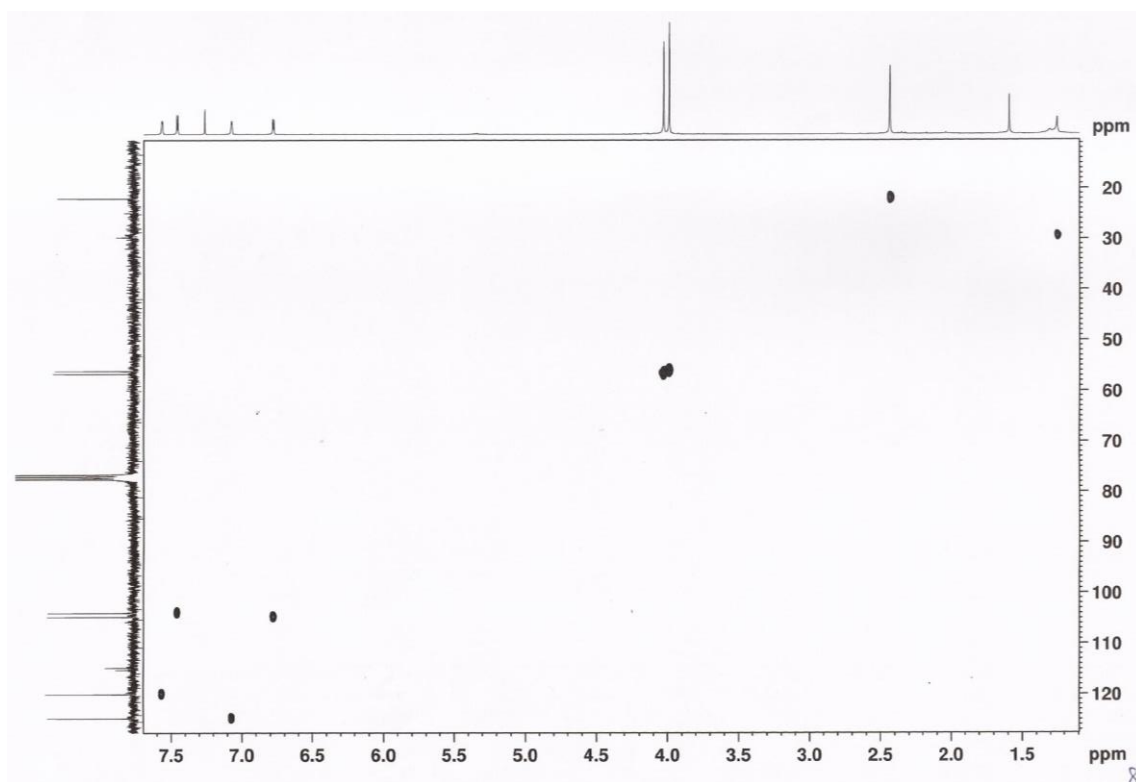

**Figure S13.** HMBC spectrum of **3a** (CDCl<sub>3</sub>, 300 MHz)

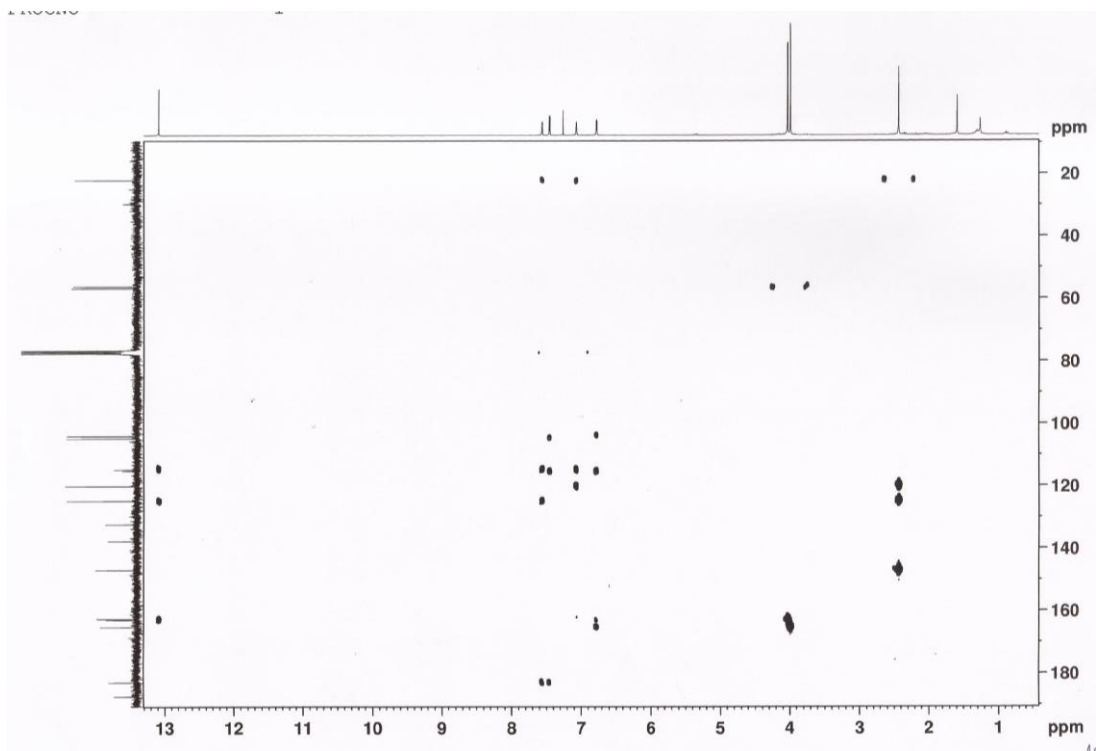

**Figure S14.** <sup>1</sup>H NMR spectrum of **3b** (CDCl<sub>3</sub>, 300 MHz)

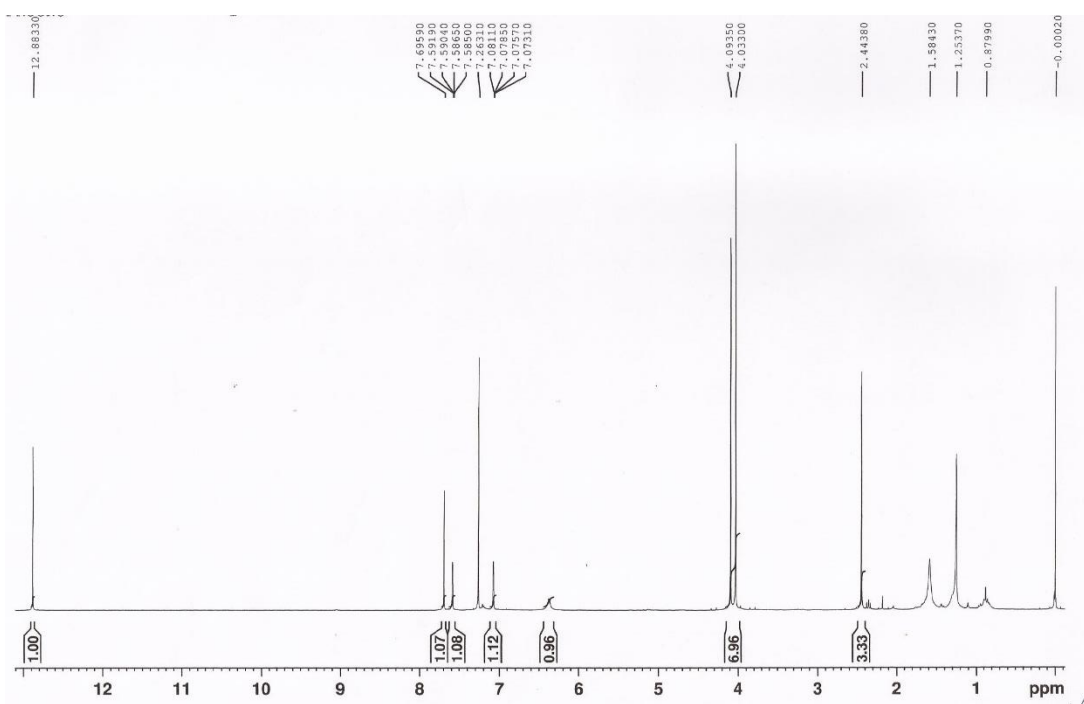



**Figure S15.**  $^{13}\text{C}$  NMR spectrum of **3b** ( $\text{CDCl}_3$ , 75 MHz)

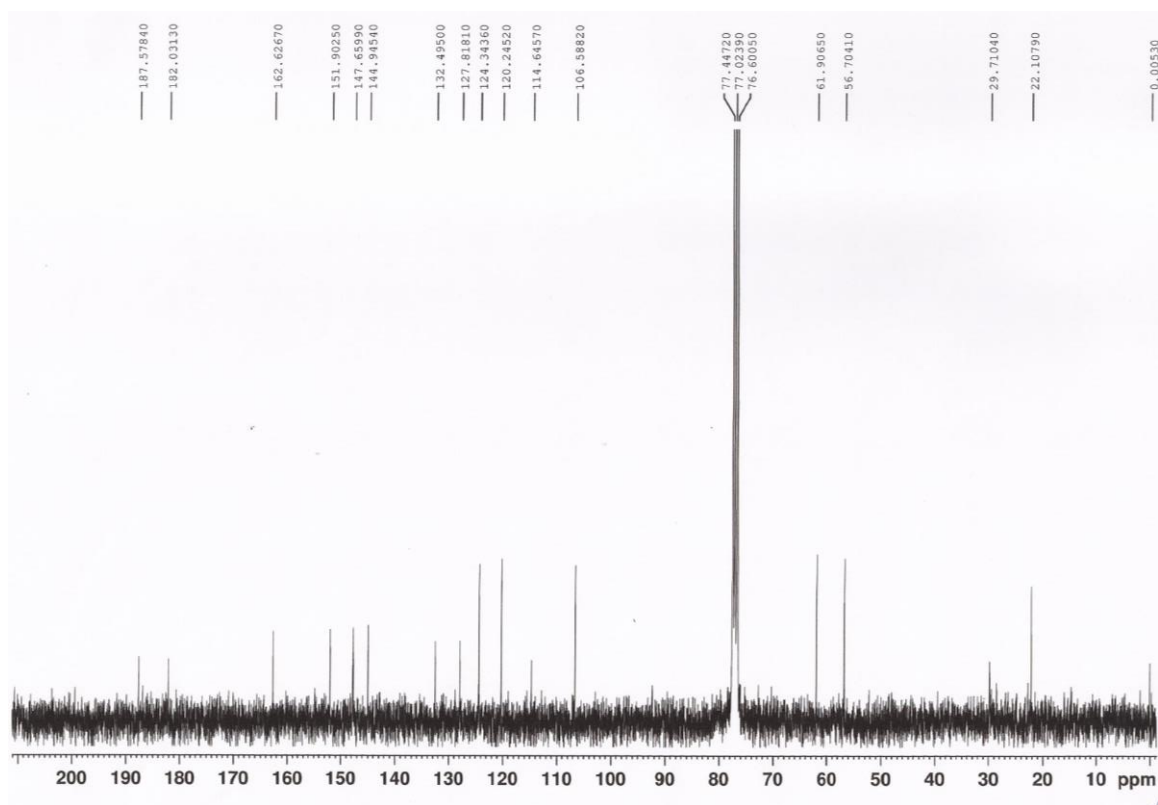

**Figure S16.** COSY spectrum of **3b** ( $\text{CDCl}_3$ , 300 MHz)

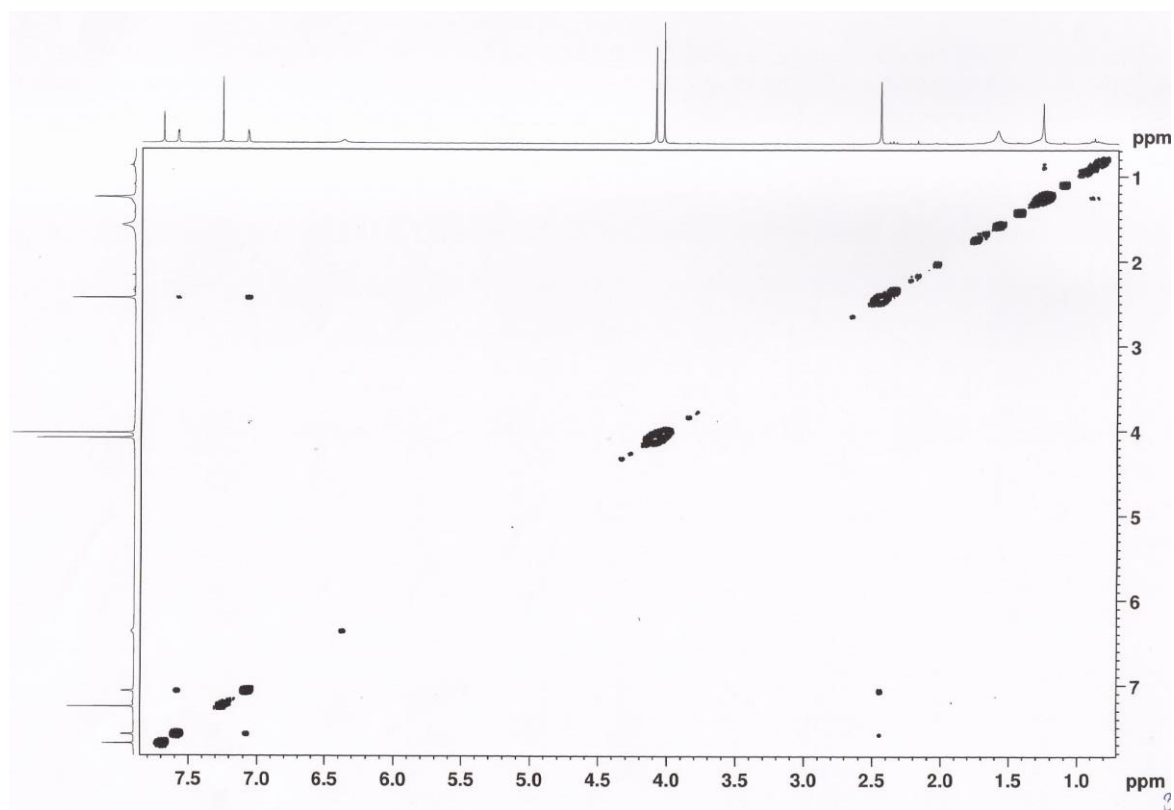

**Figure S17.** HSQC spectrum of **3b** (CDCl<sub>3</sub>, 300 MHz).

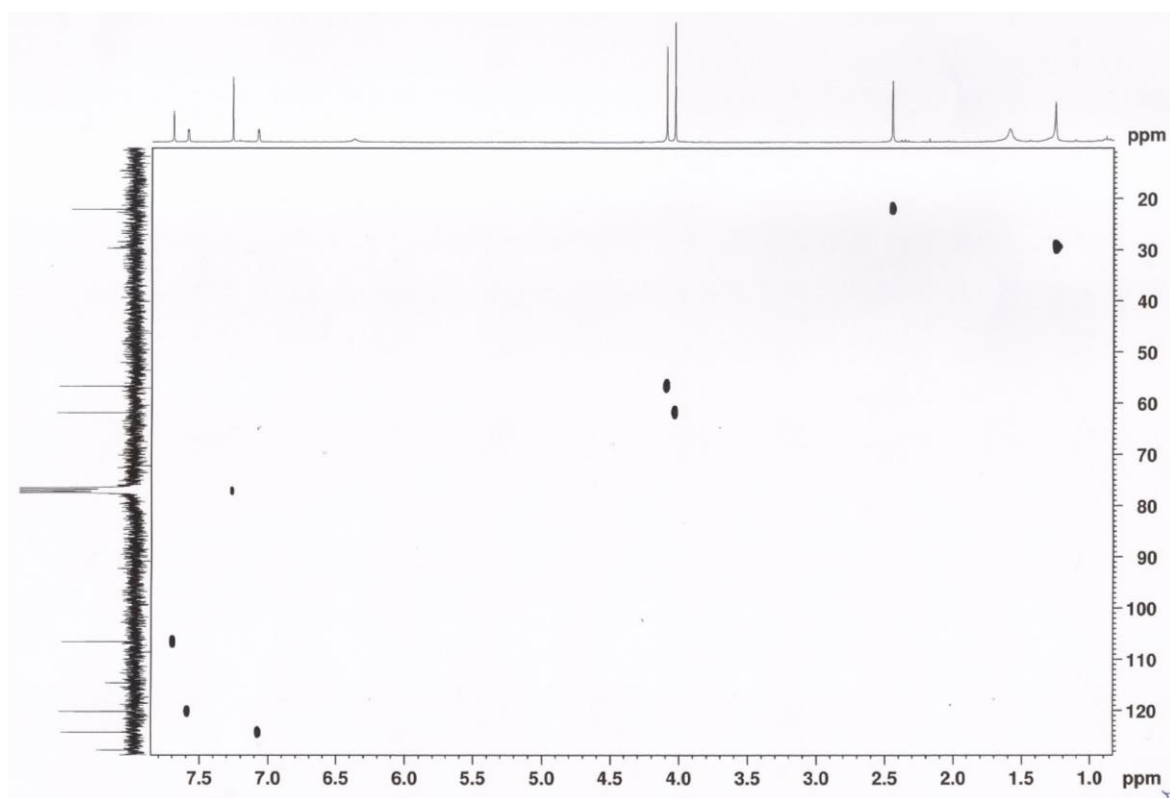

**Figure S18.** HMBC spectrum of **3b** (CDCl<sub>3</sub>, 300 MHz)

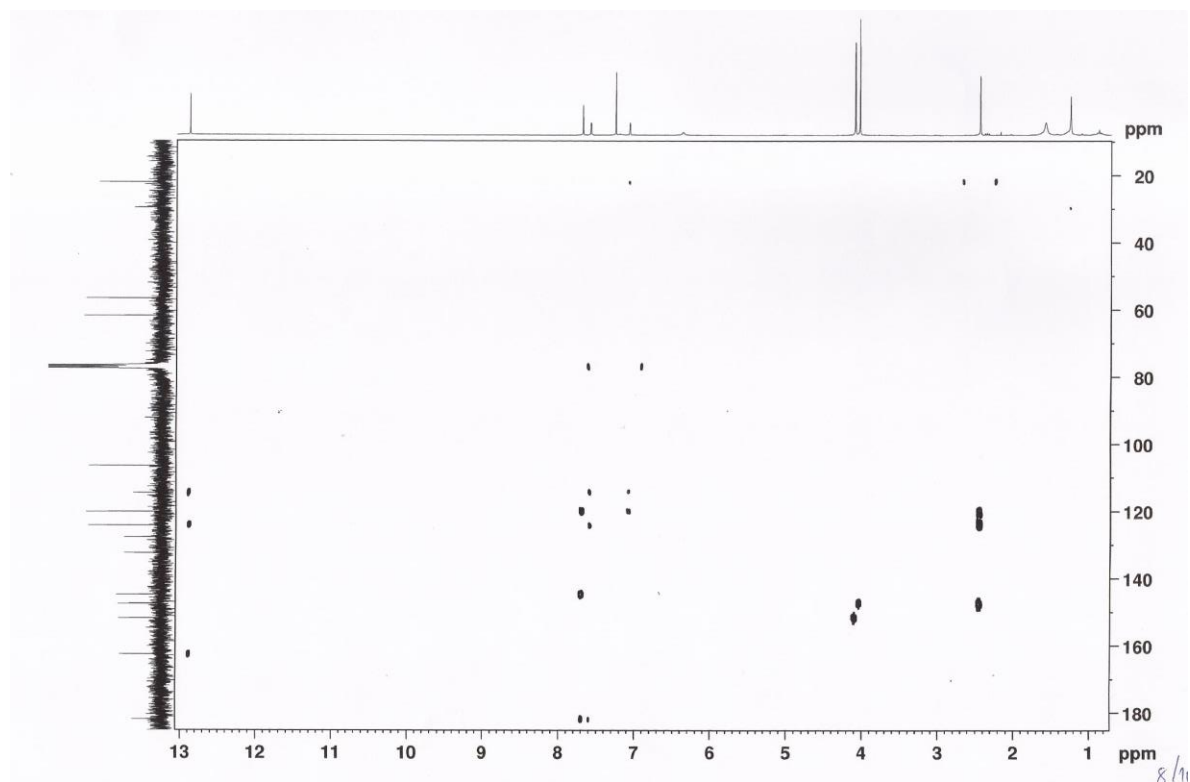

**Figure S19.**  $^1\text{H}$  NMR spectrum of **3c** ( $\text{CDCl}_3$ , 300 MHz).

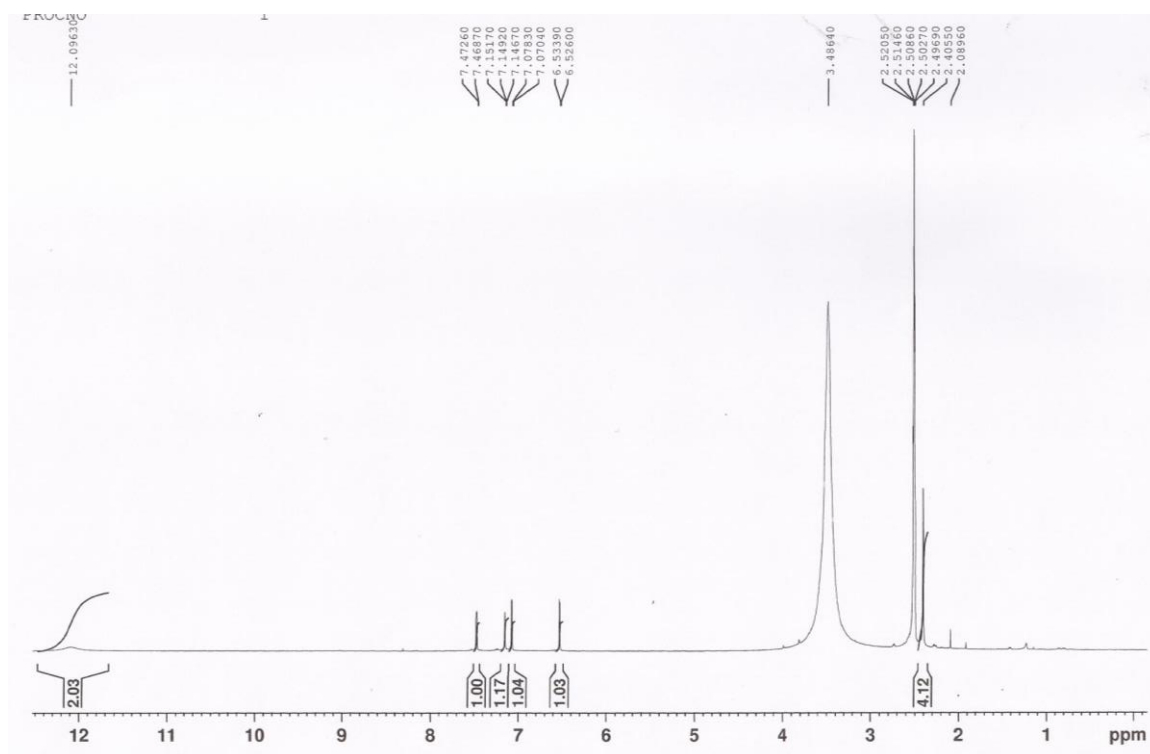

**Figure S20.**  $^{13}\text{C}$  NMR spectrum of **3c** ( $\text{CDCl}_3$ , 75 MHz).

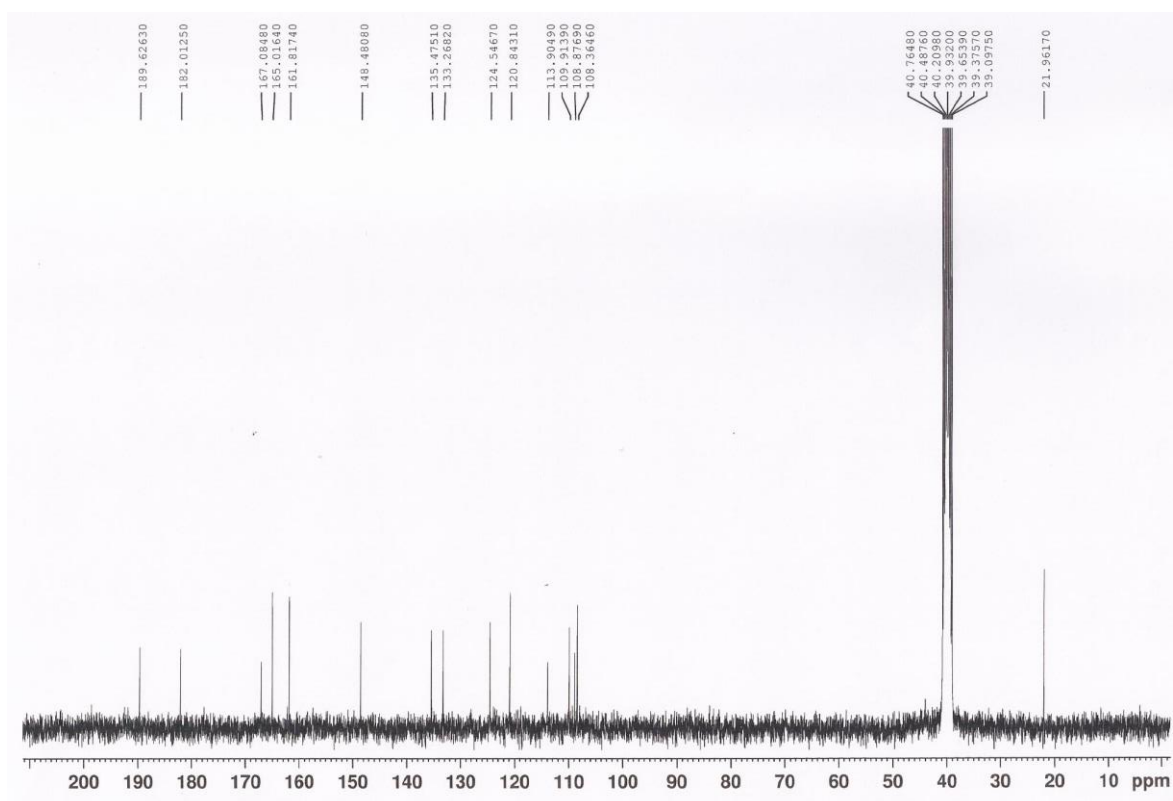

**Figure S21.** COSY spectrum of **3c** (CDCl<sub>3</sub>, 300 MHz).

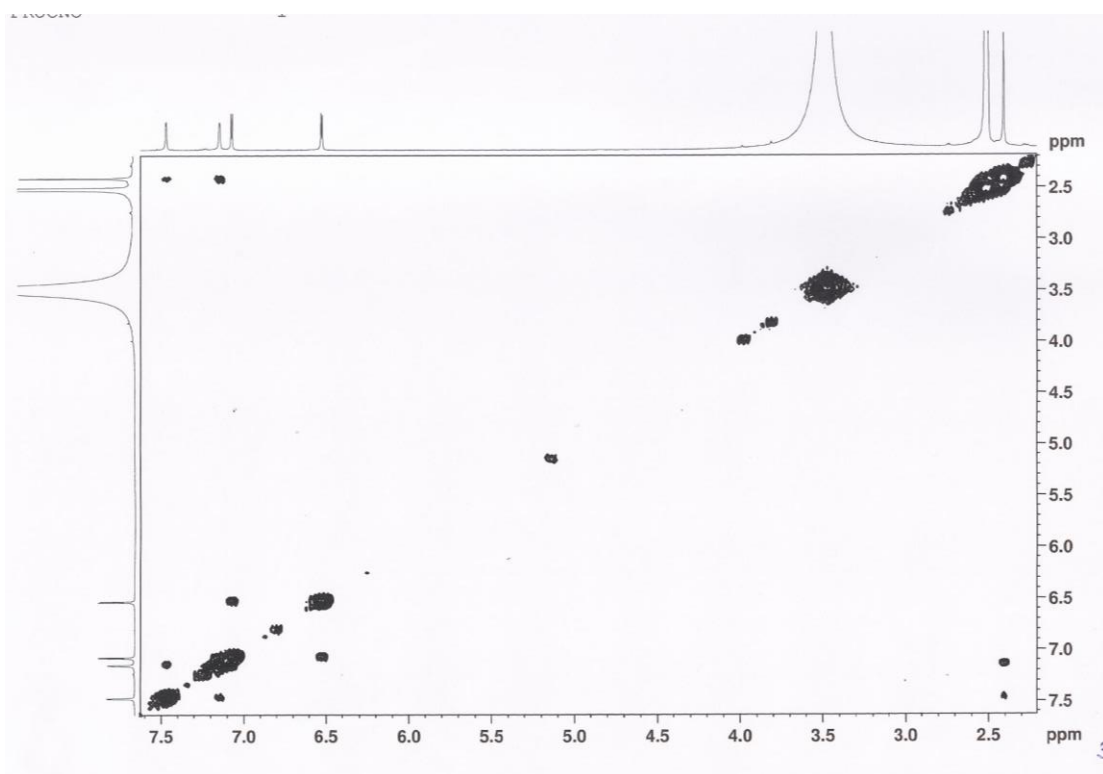

**Figure S22.** HSQC spectrum of **3c** (CDCl<sub>3</sub>, 300 MHz).

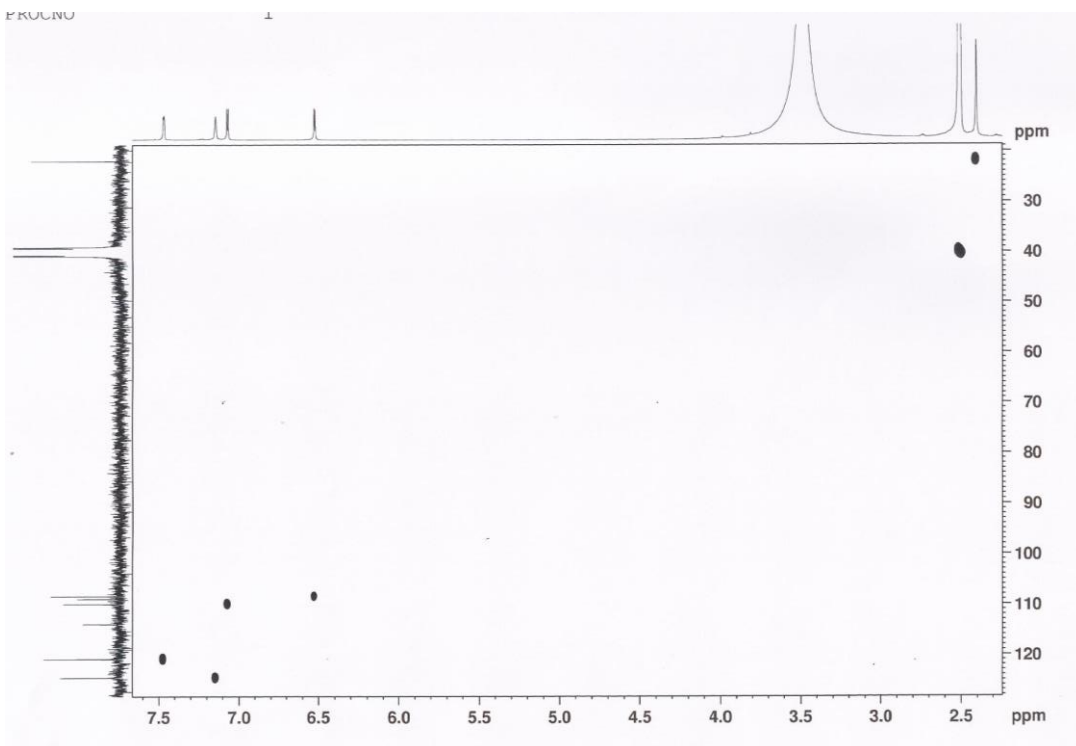

**Figure S23.** HMBC spectrum of **3c** (CDCl<sub>3</sub>, 300 MHz).

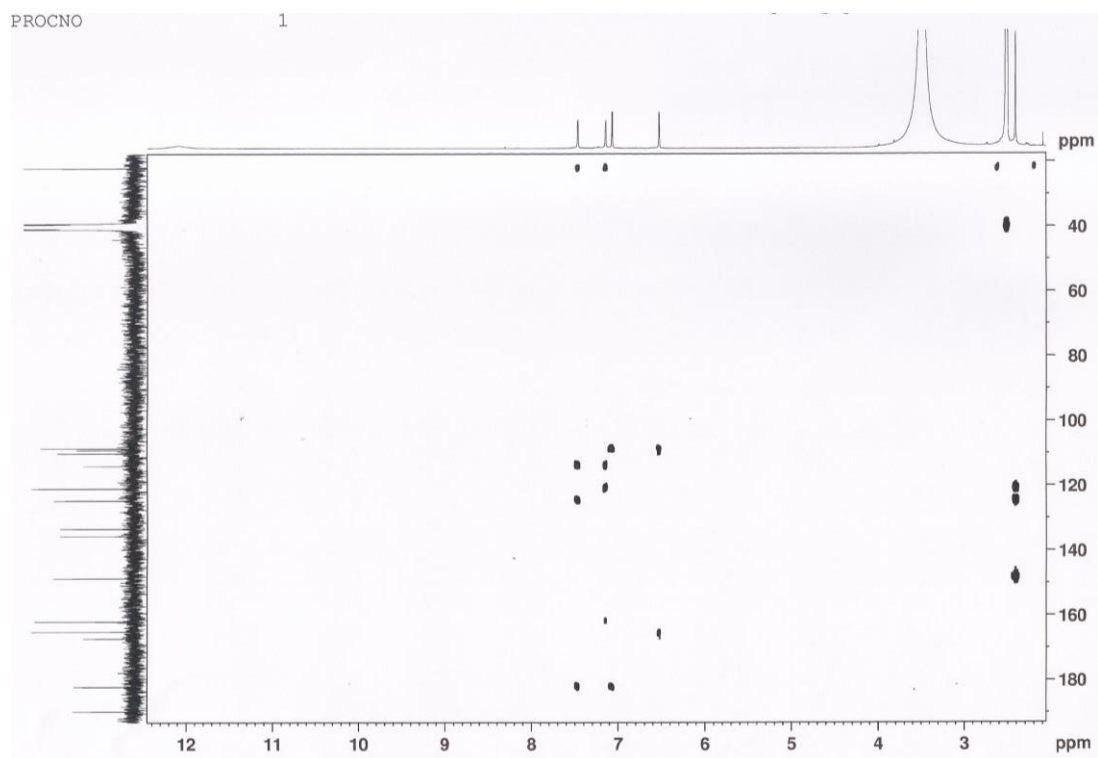

**Figure S24.** <sup>1</sup>H NMR spectrum of **4** (DMSO-*d*<sub>6</sub>, 500 MHz).

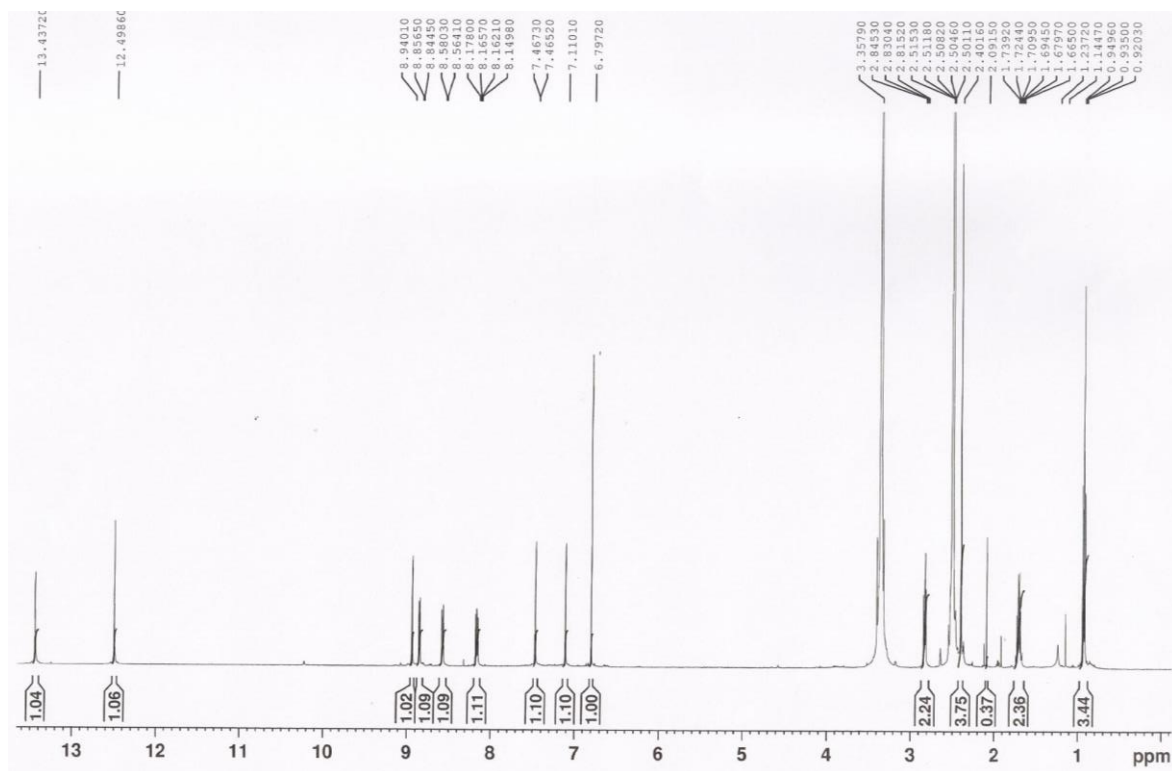

**Figure S25.**  $^{13}\text{C}$  NMR spectrum of **4** (DMSO- $d_6$ , 125 MHz).

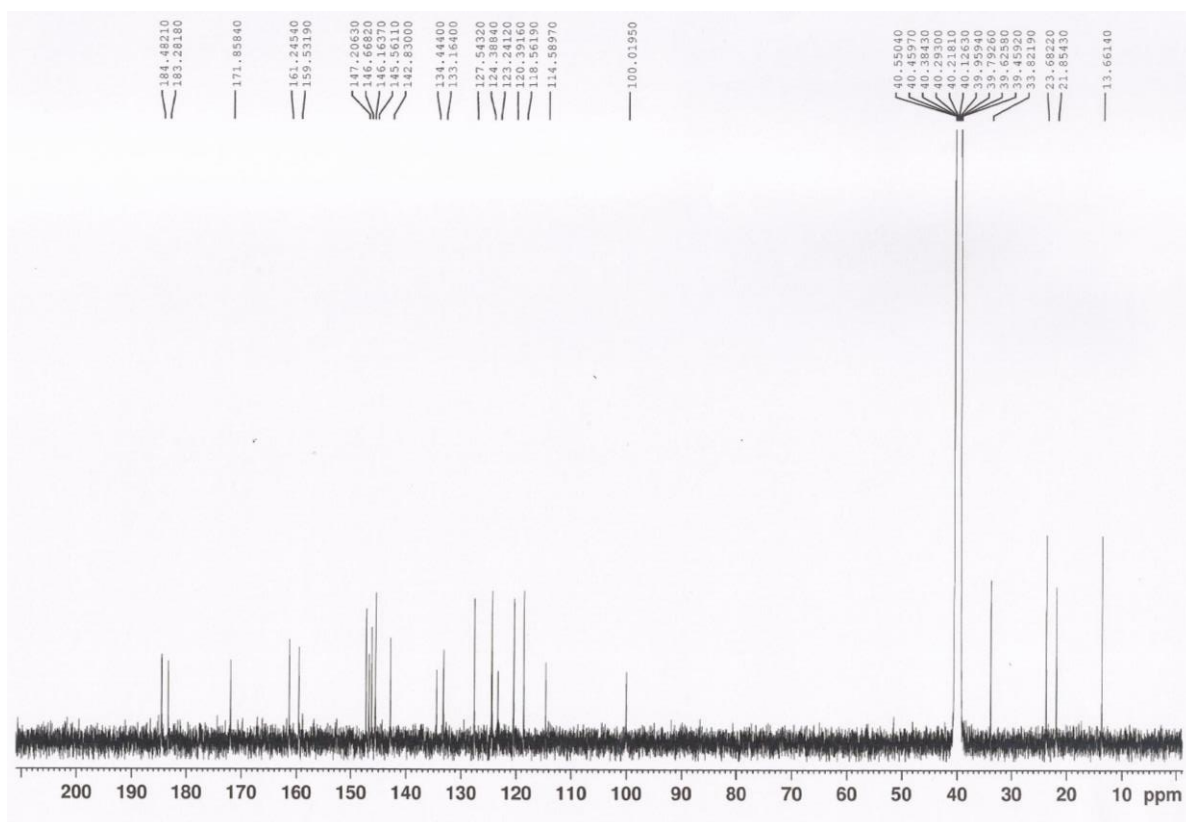

**Figure S26.** COSY spectrum of **4** (CD DMSO- $d_6$ , 500 MHz).

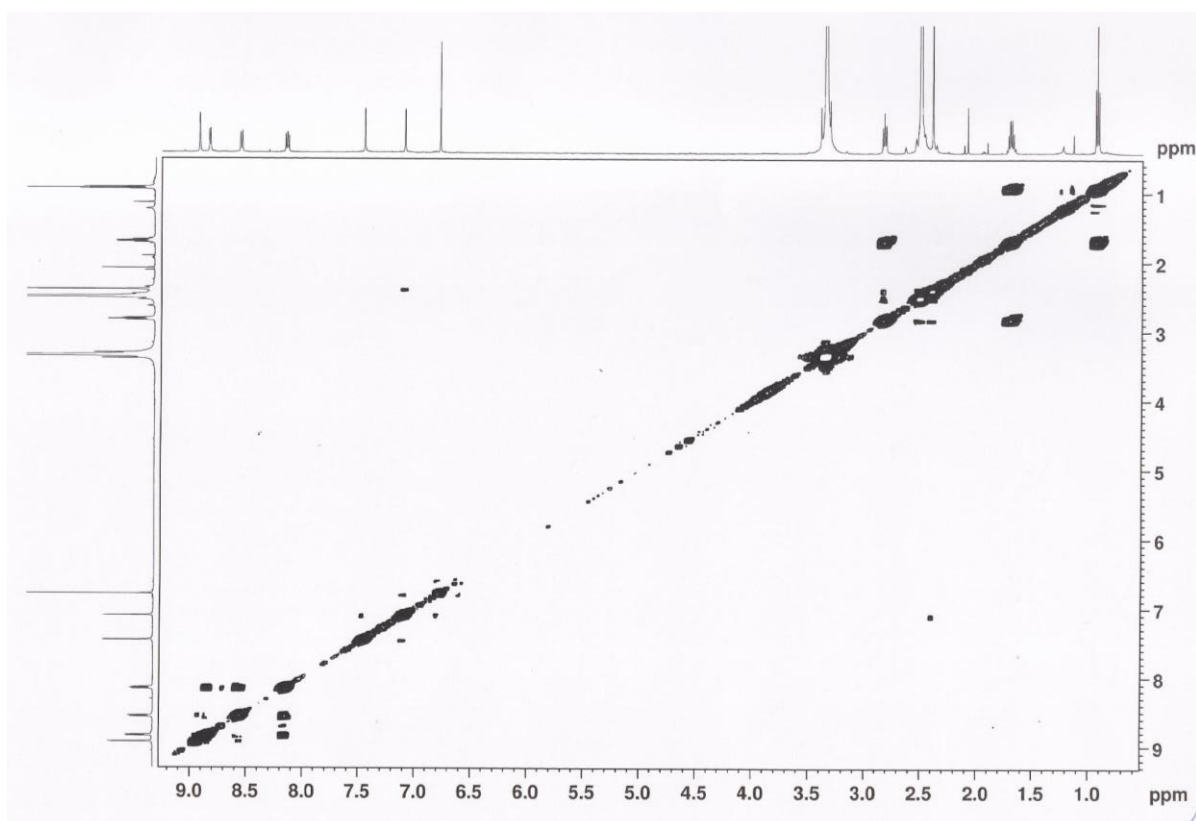

**Figure S27.** HSQC spectrum of **4** (DMSO-*d*<sub>6</sub>, 500 MHz).

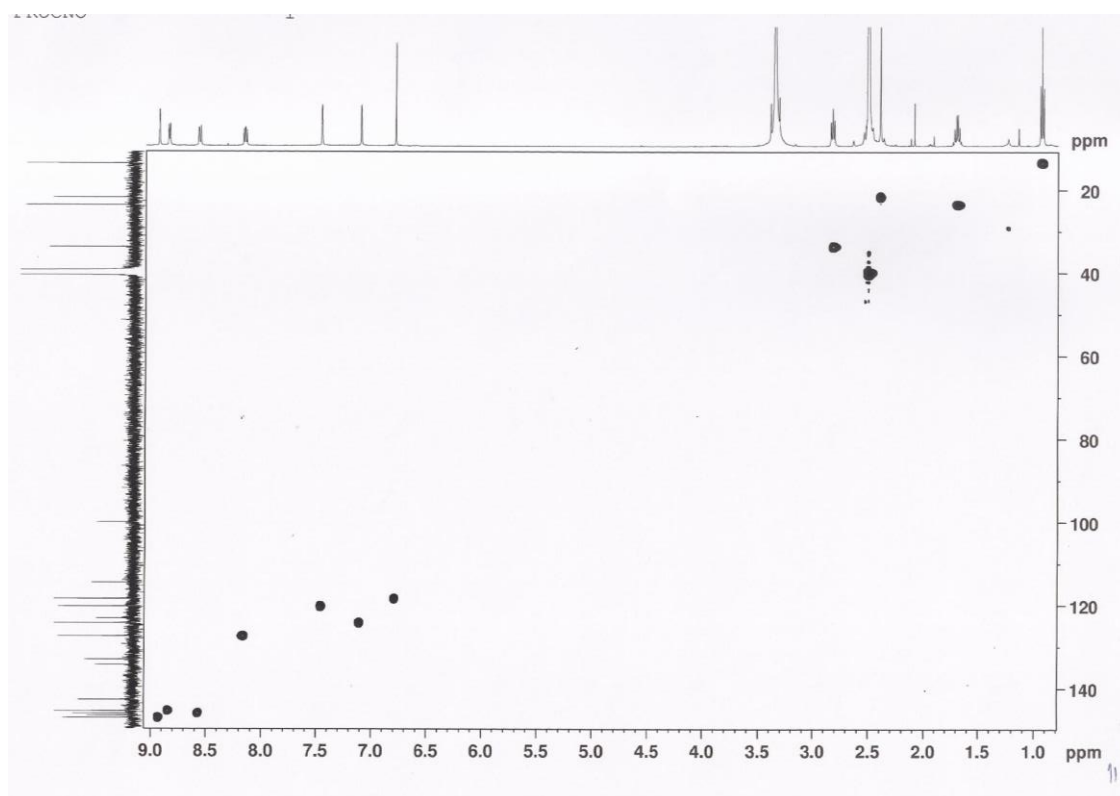

**Figure S28.** HMBC spectrum of **4** (DMSO-*d*<sub>6</sub>, 500 MHz).

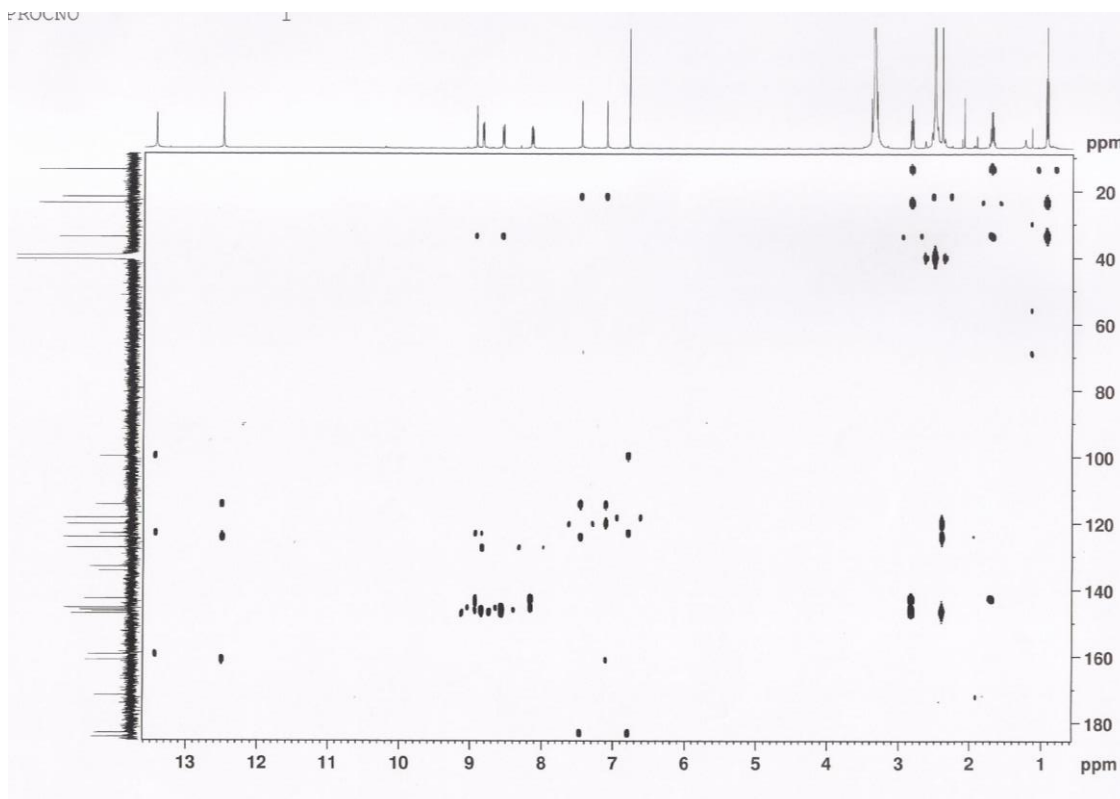

**Figure S29.**  $^1\text{H}$  NMR spectrum of **5a** ( $\text{CDCl}_3$ , 300 MHz).

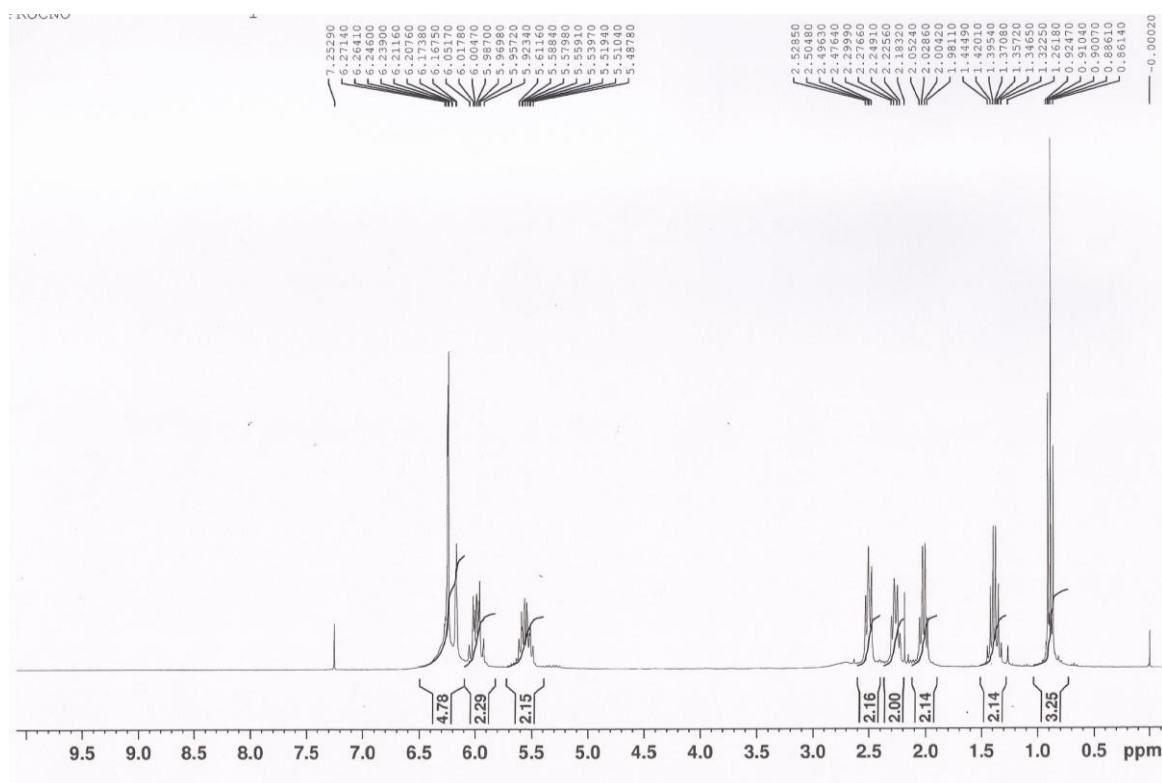

**Figure S30.**  $^{13}\text{C}$  NMR spectrum of **5a** ( $\text{CDCl}_3$ , 75 MHz).

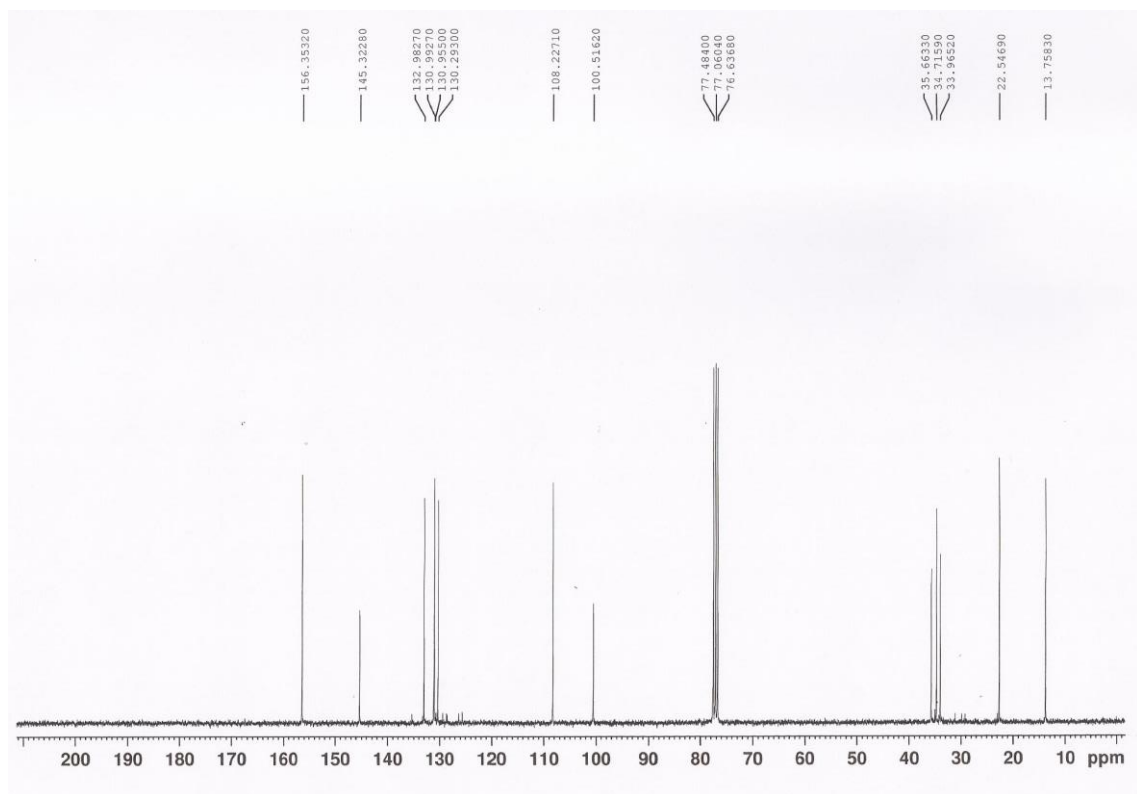



**Figure S31.** COSY spectrum of **5a** (CDCl<sub>3</sub>, 300 MHz).

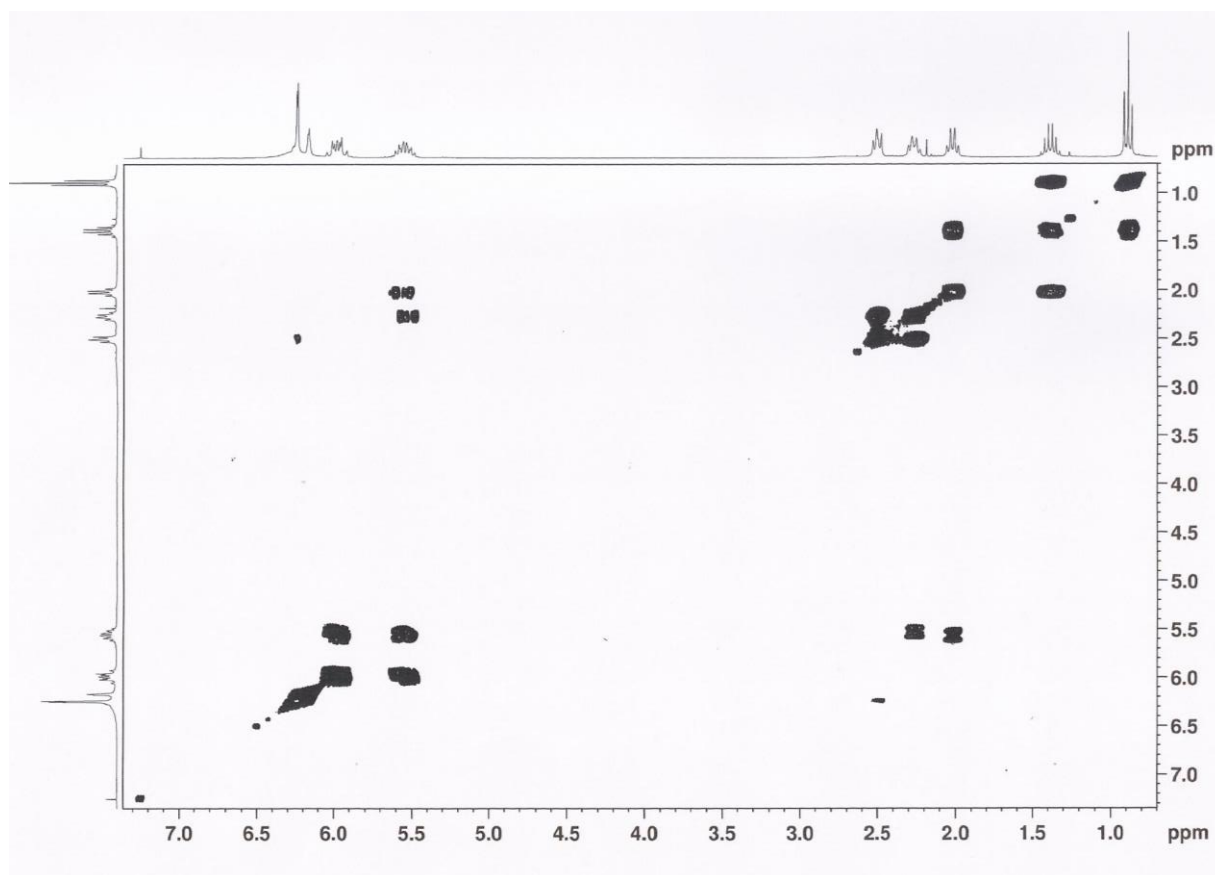

**Figure S32.** HSQC spectrum of **5a** (CDCl<sub>3</sub>, 300 MHz).

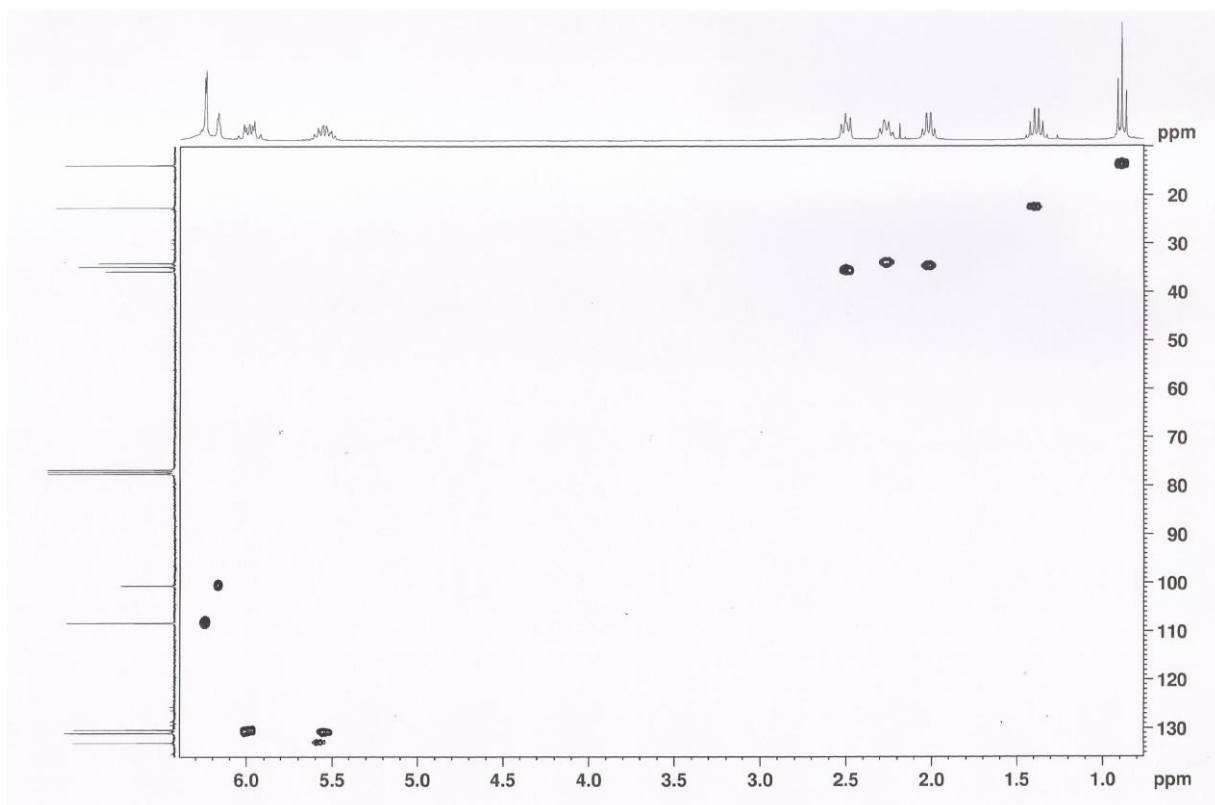

**Figure S33.** HMBC spectrum of **5a** (CDCl<sub>3</sub>, 300 MHz).

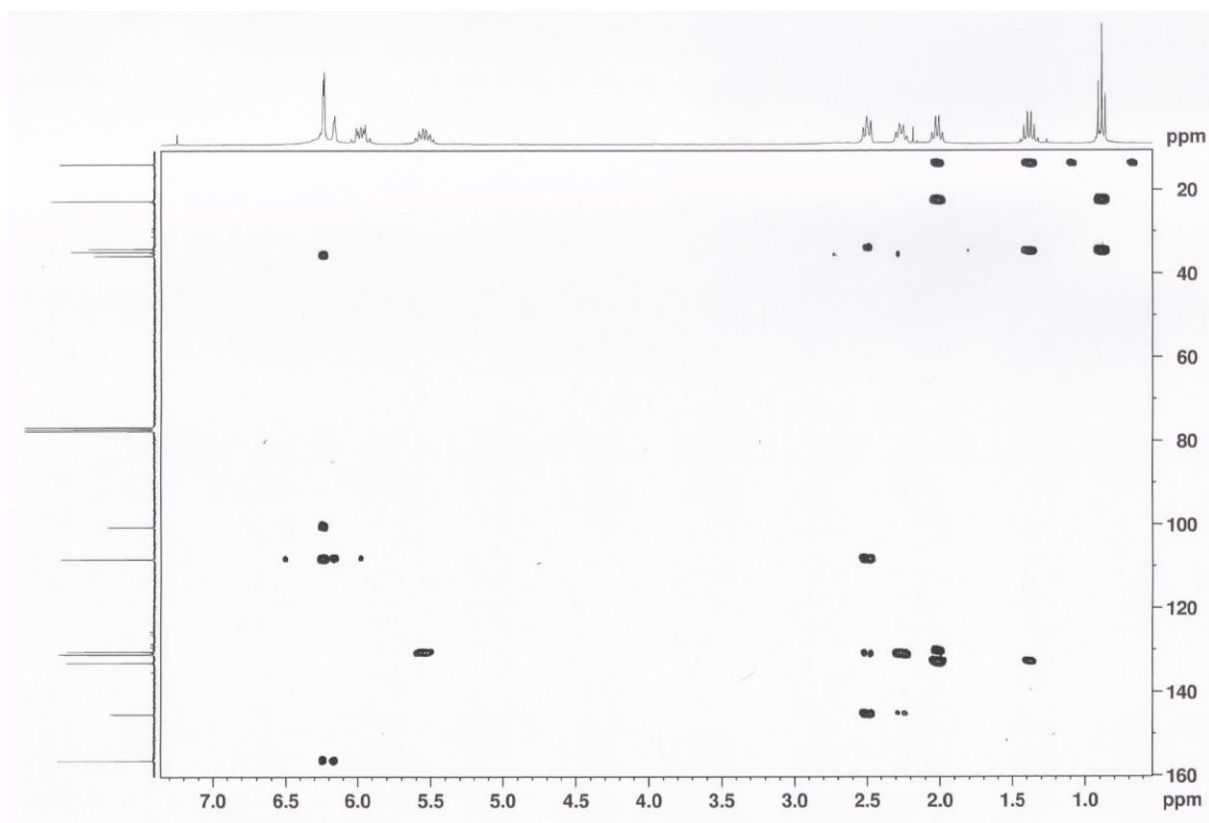

**Figure S34.** <sup>1</sup>H NMR spectrum of **5b** (DMSO-*d*<sub>6</sub>, 300 MHz).

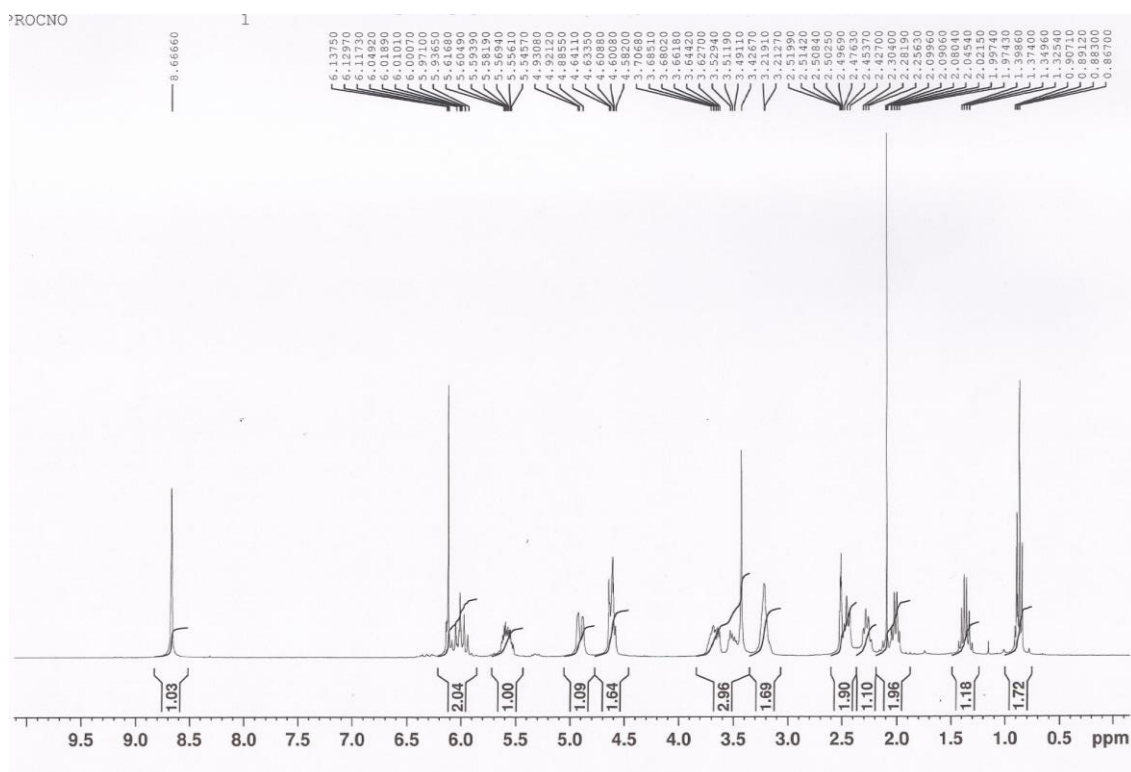

**Figure S35.**  $^{13}\text{C}$  NMR spectrum of **5b** (DMSO-*d*<sub>6</sub>, 75 MHz).

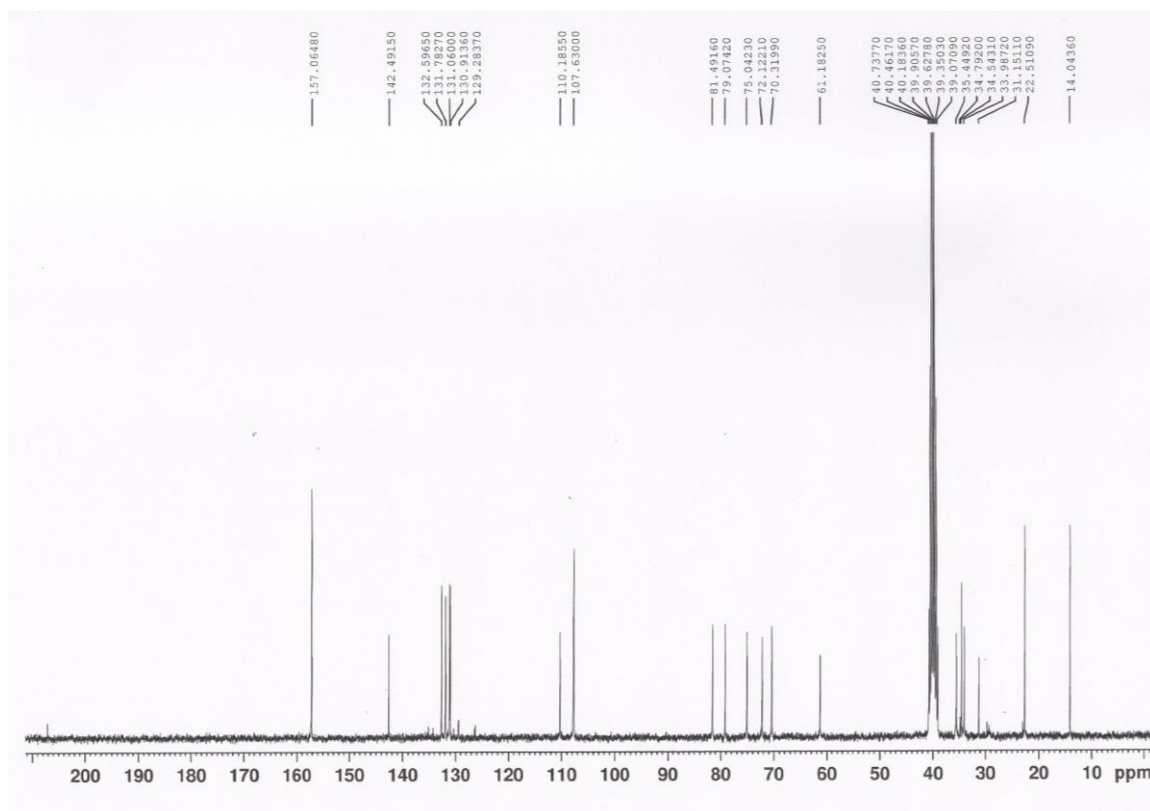

**Figure S36.** COSY spectrum of **5b** (DMSO-*d*<sub>6</sub>, 300 MHz).

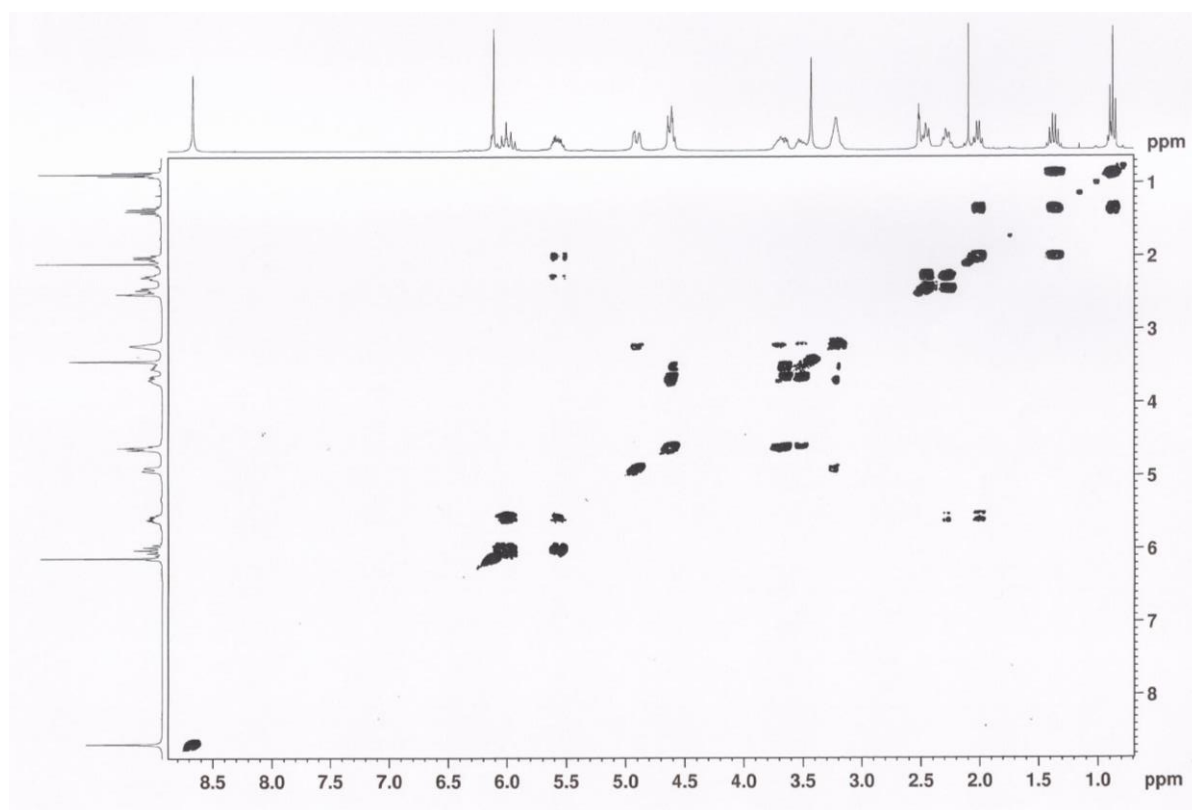

**Figure S37.** HSQC spectrum of **5b** (DMSO-*d*<sub>6</sub>, 300 MHz).

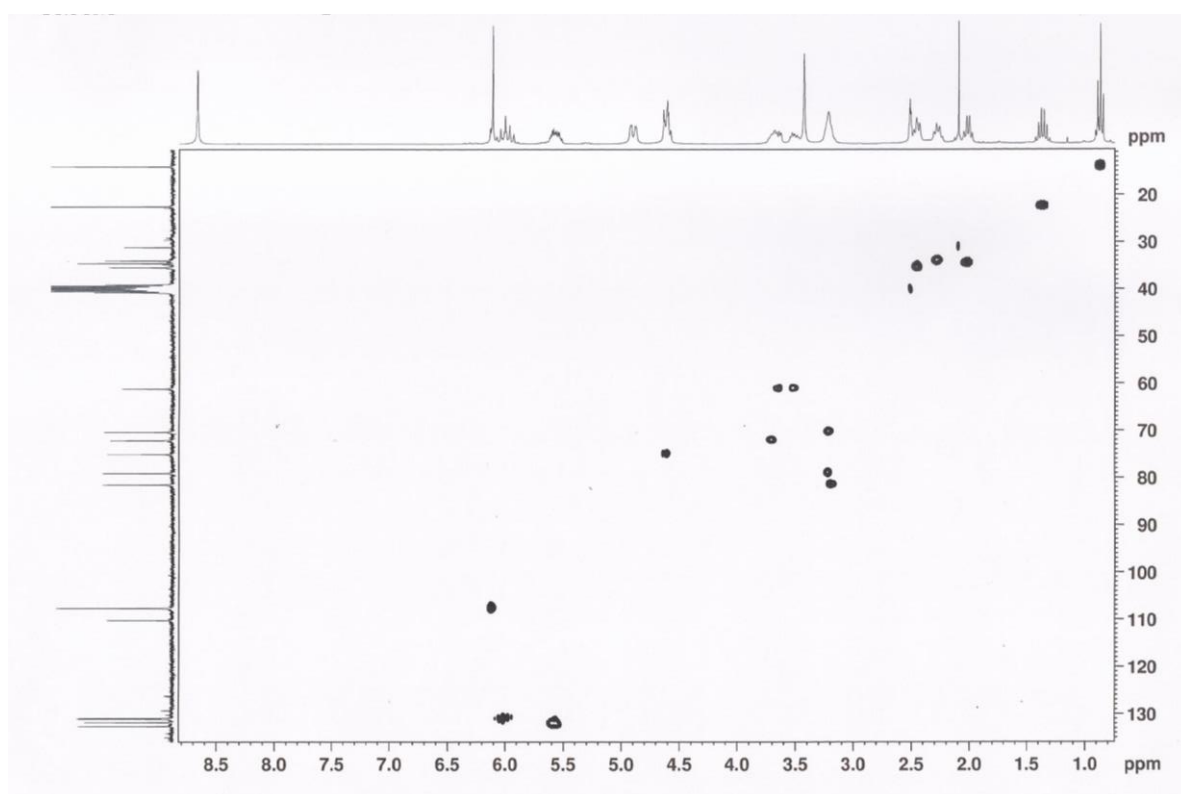

**Figure S38.** HMBC spectrum of **5b** (DMSO-*d*<sub>6</sub>, 300 MHz).

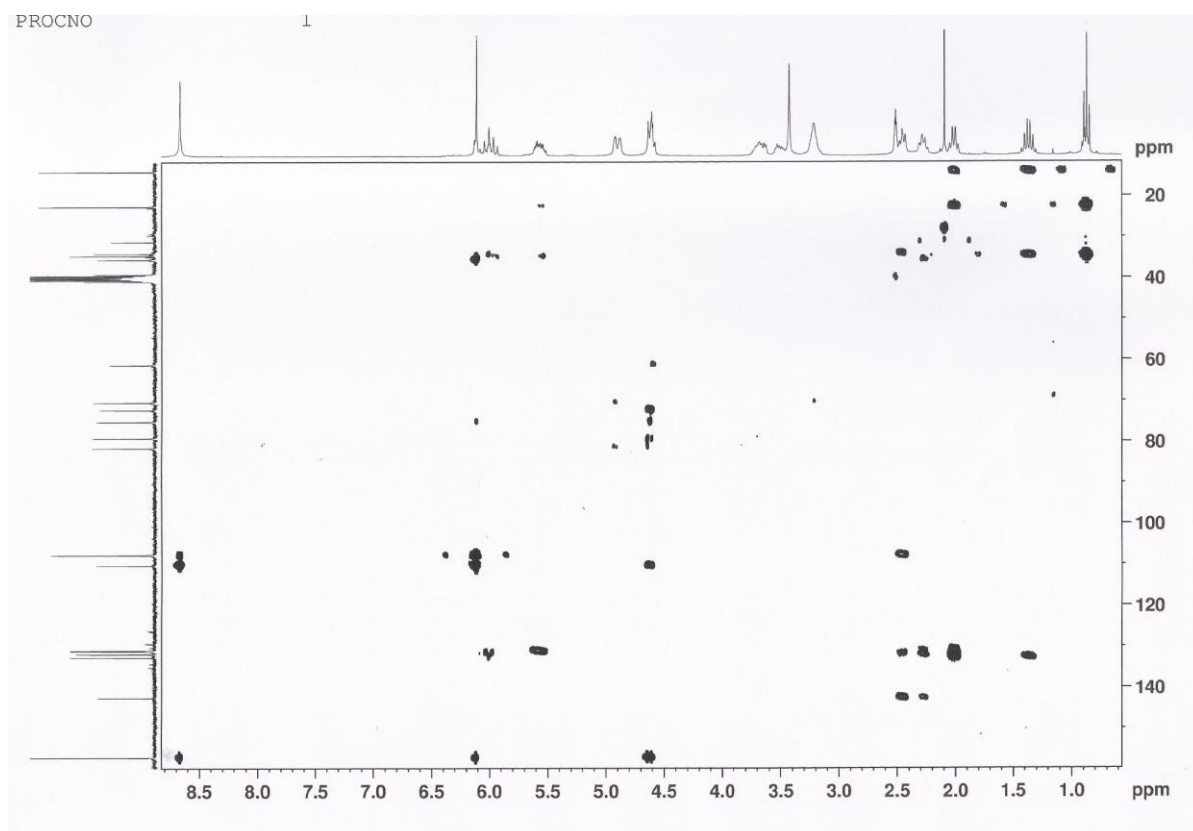

**Figure S39.**  $^1\text{H}$  NMR spectrum of **5c** (DMSO-*d*<sub>6</sub>, 500 MHz).

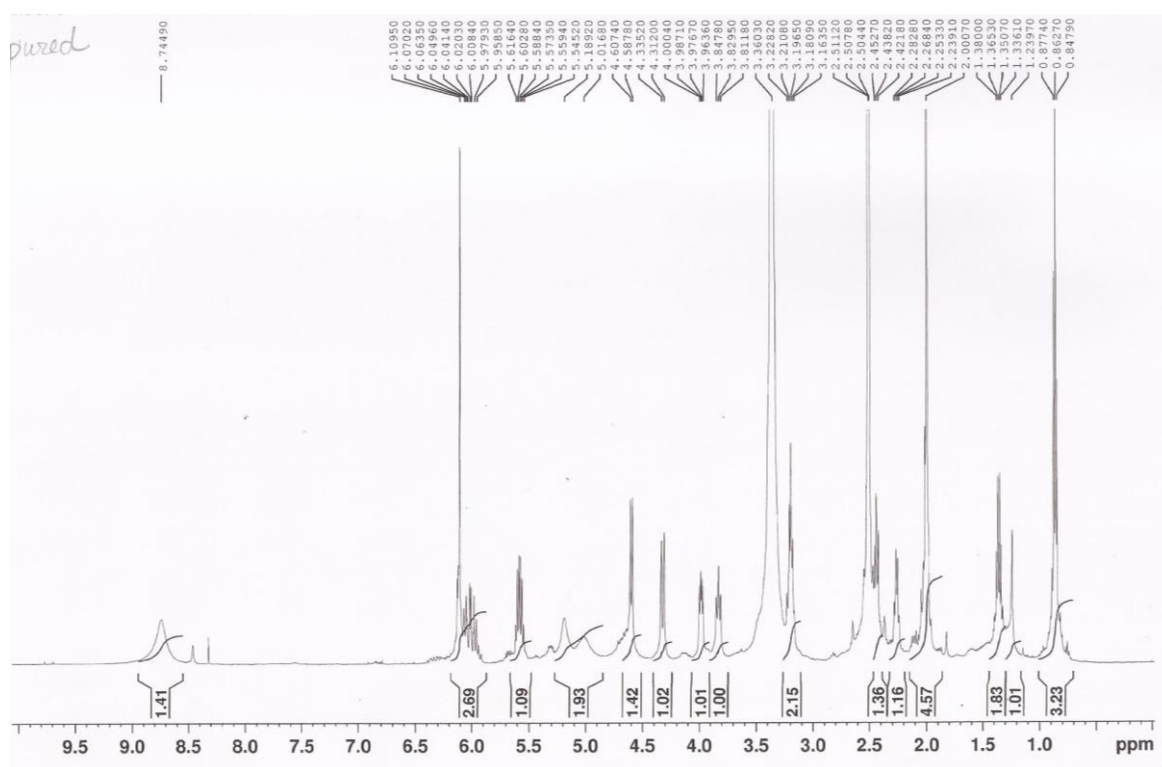

**Figure S40.**  $^{13}\text{C}$  NMR spectrum of **5c** (DMSO-*d*<sub>6</sub>, 125 MHz)

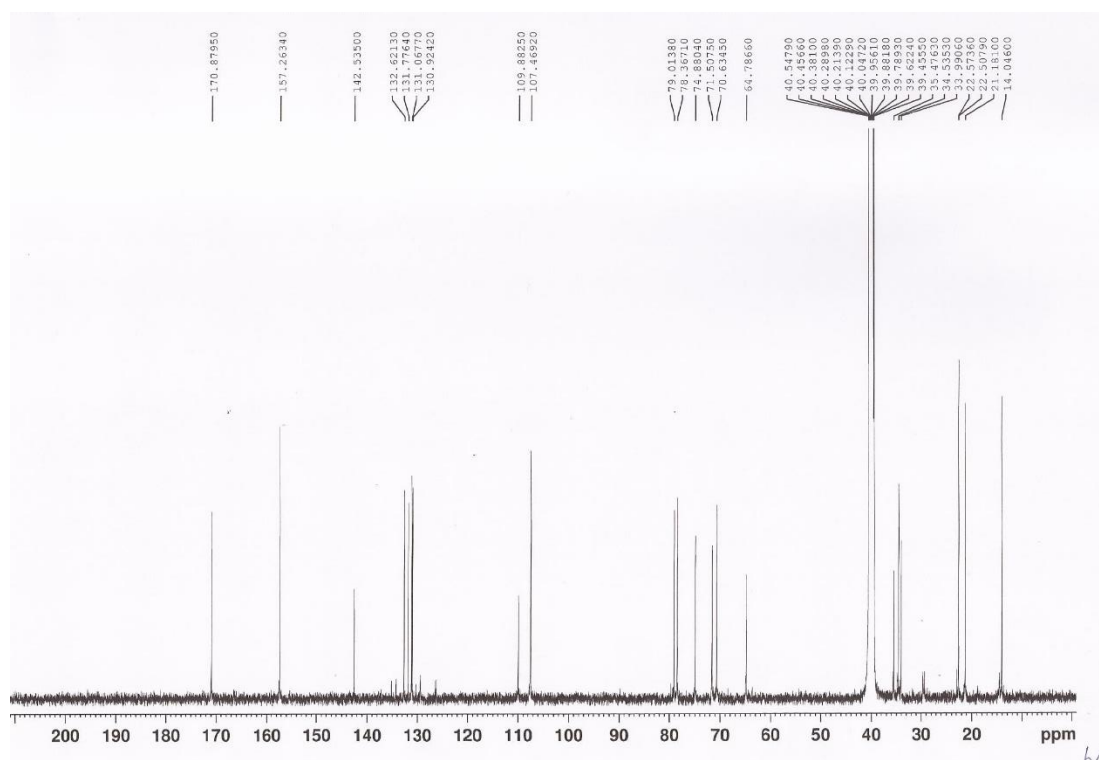

**Figure S41.** COSY spectrum of **5c** (DMSO-*d*<sub>6</sub>, 500 MHz)

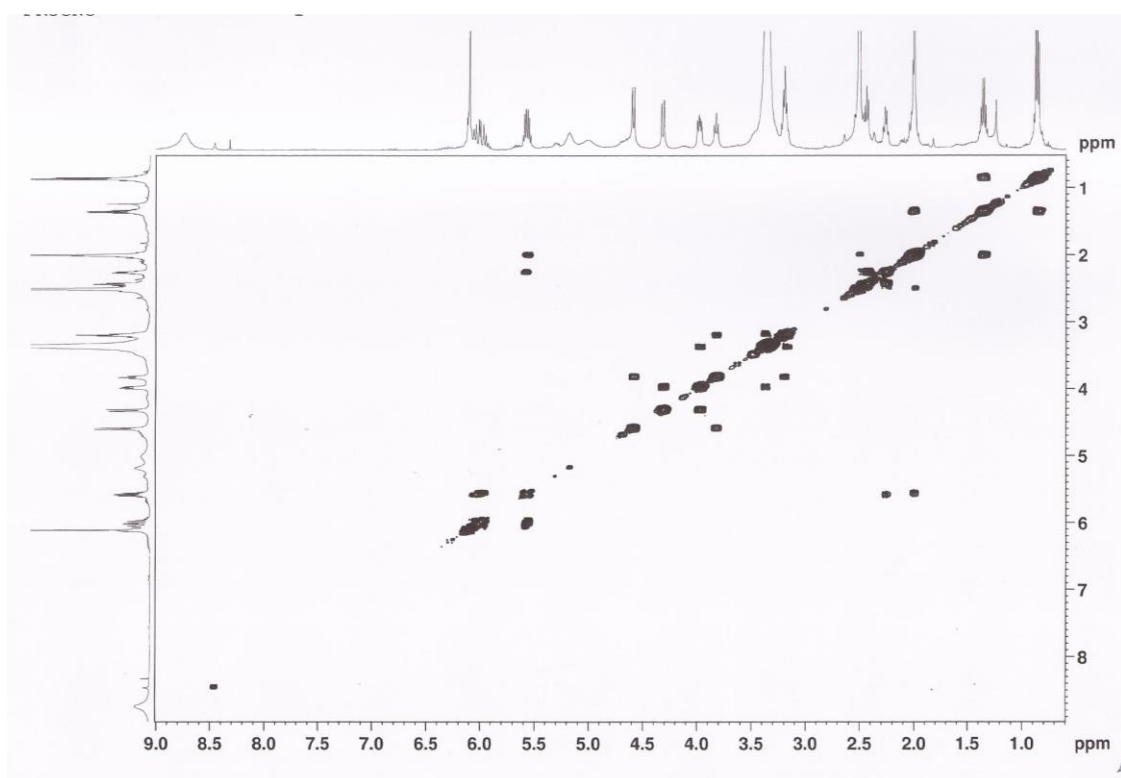

**Figure S42.** HSQC spectrum of **5c** (DMSO-*d*<sub>6</sub>, 500 MHz).

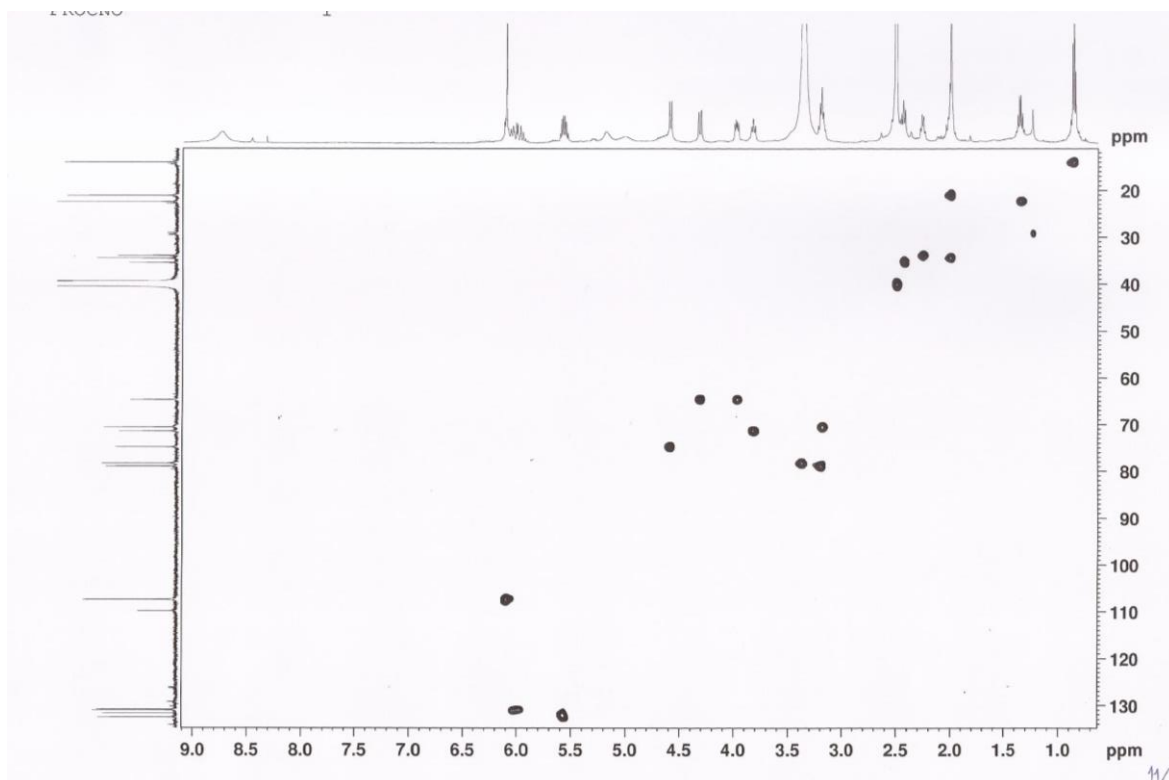

**Figure S43.** HMBC spectrum of **5c** (DMSO-*d*<sub>6</sub>, 500 MHz).

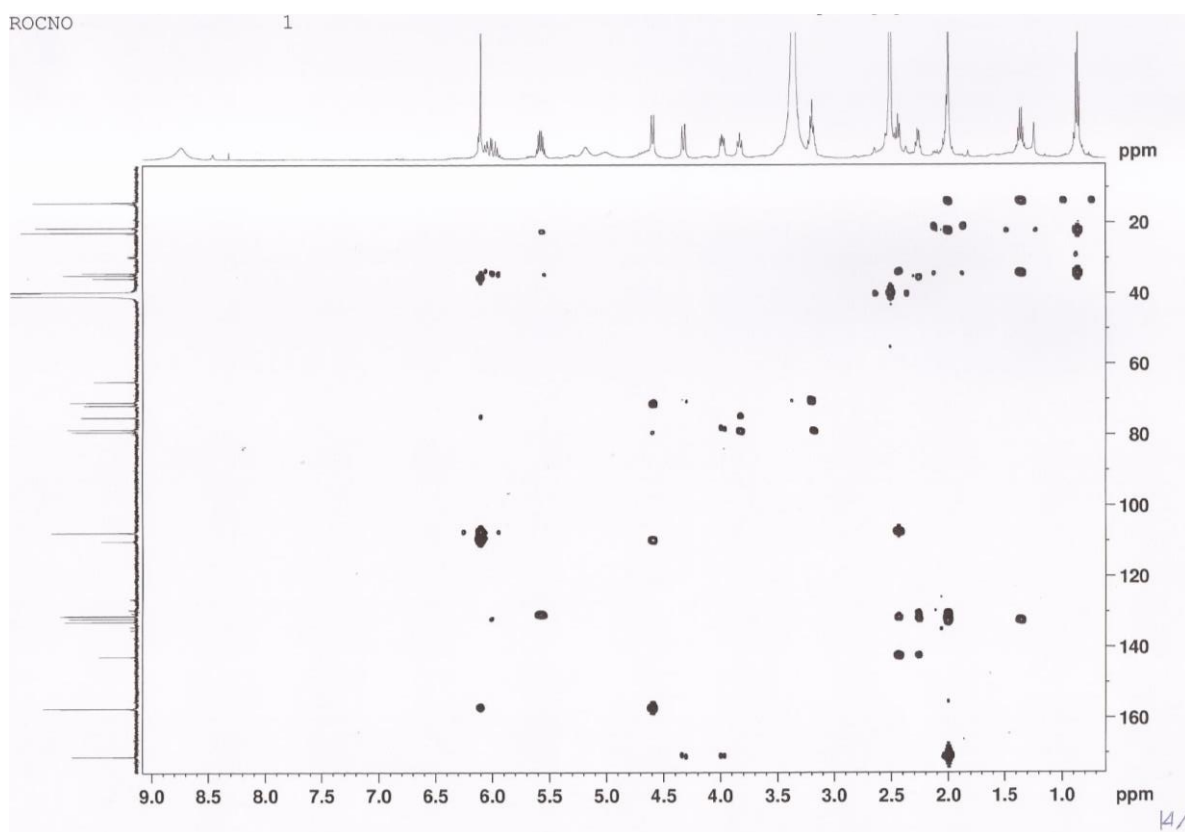

**Figure S44.** <sup>1</sup>H NMR spectrum of **5c** (DMSO-*d*<sub>6</sub>, 300 MHz).

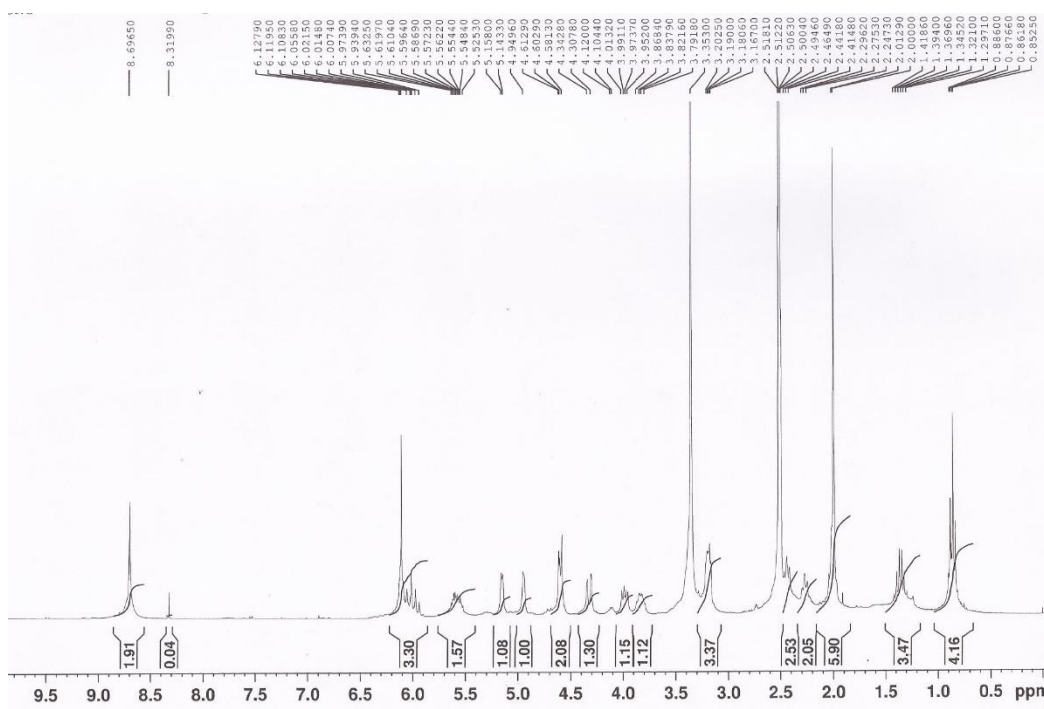



**Figure S45.** COSY spectrum of **5c** (DMSO-*d*<sub>6</sub>, 300 MHz).

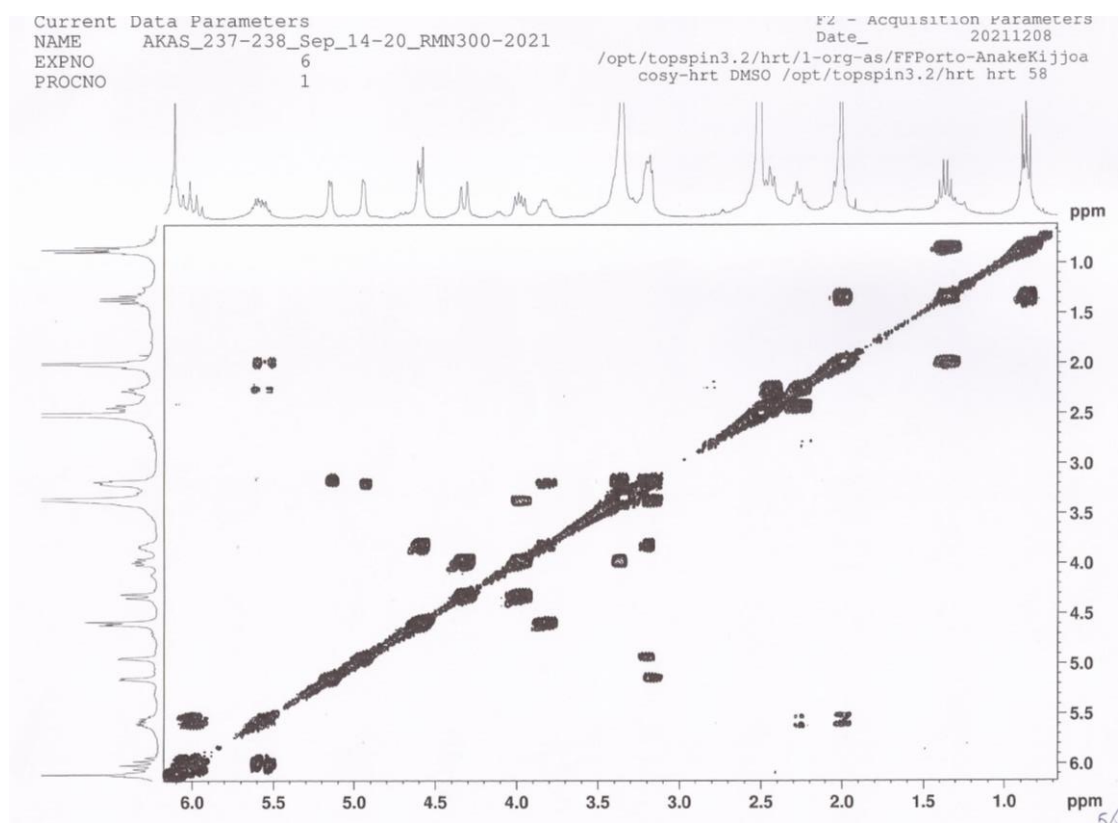

**Figure S46.** HMBC spectrum of **5c** (DMSO-*d*<sub>6</sub>, 300 MHz).

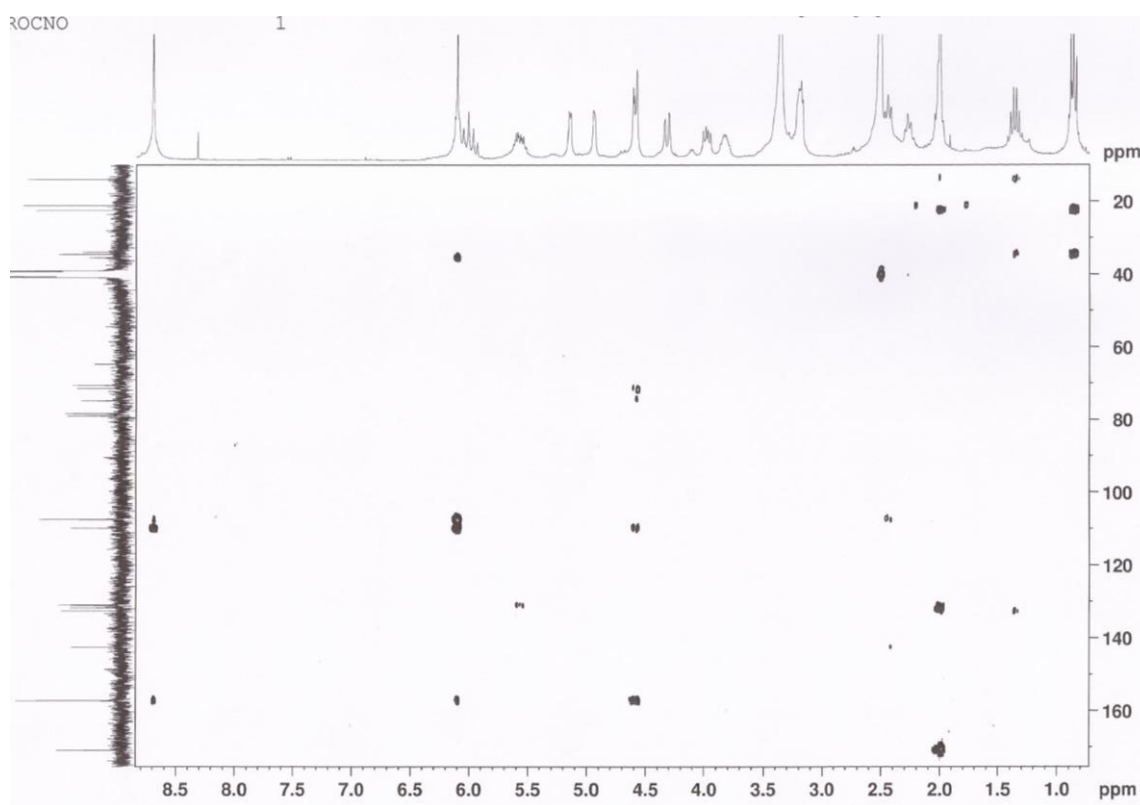



**Figure S47.**  $^1\text{H}$  NMR spectrum of **6a** ( $\text{CDCl}_3$ , 300 MHz).

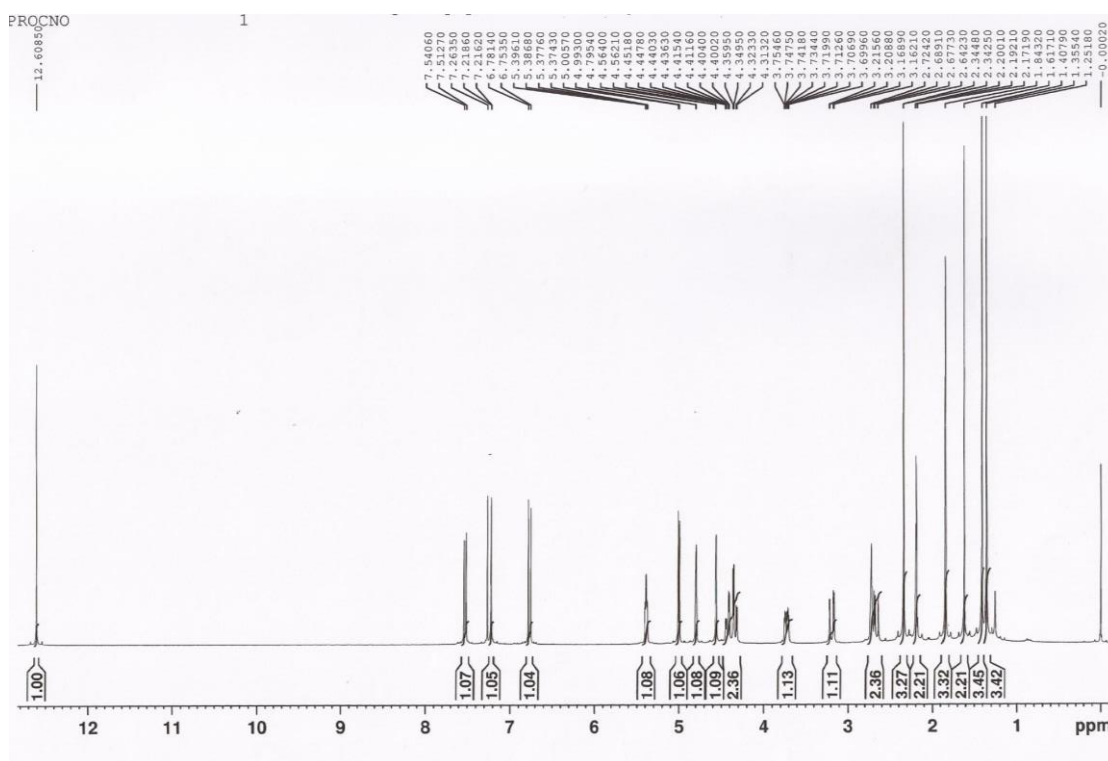

**Figure S48.**  $^{13}\text{C}$  NMR spectrum of **6a** ( $\text{CDCl}_3$ , 75 MHz).

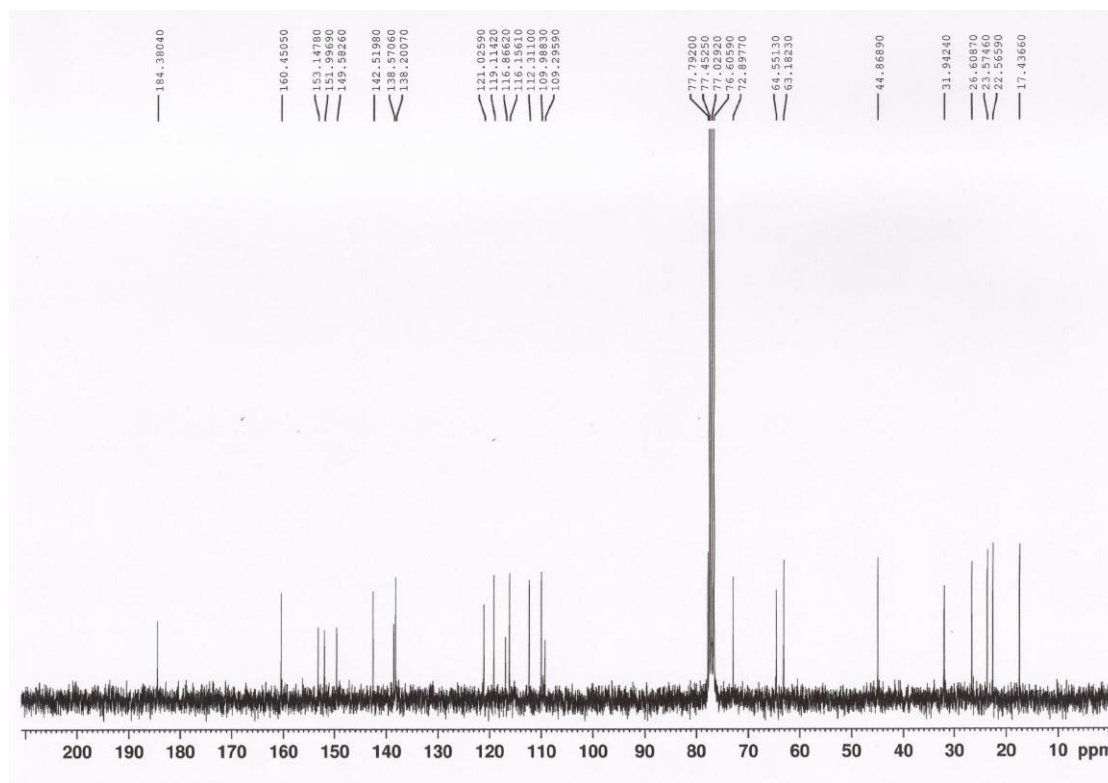

**Figure S49.** COSY spectrum of **6a** (CDCl<sub>3</sub>, 300 MHz).

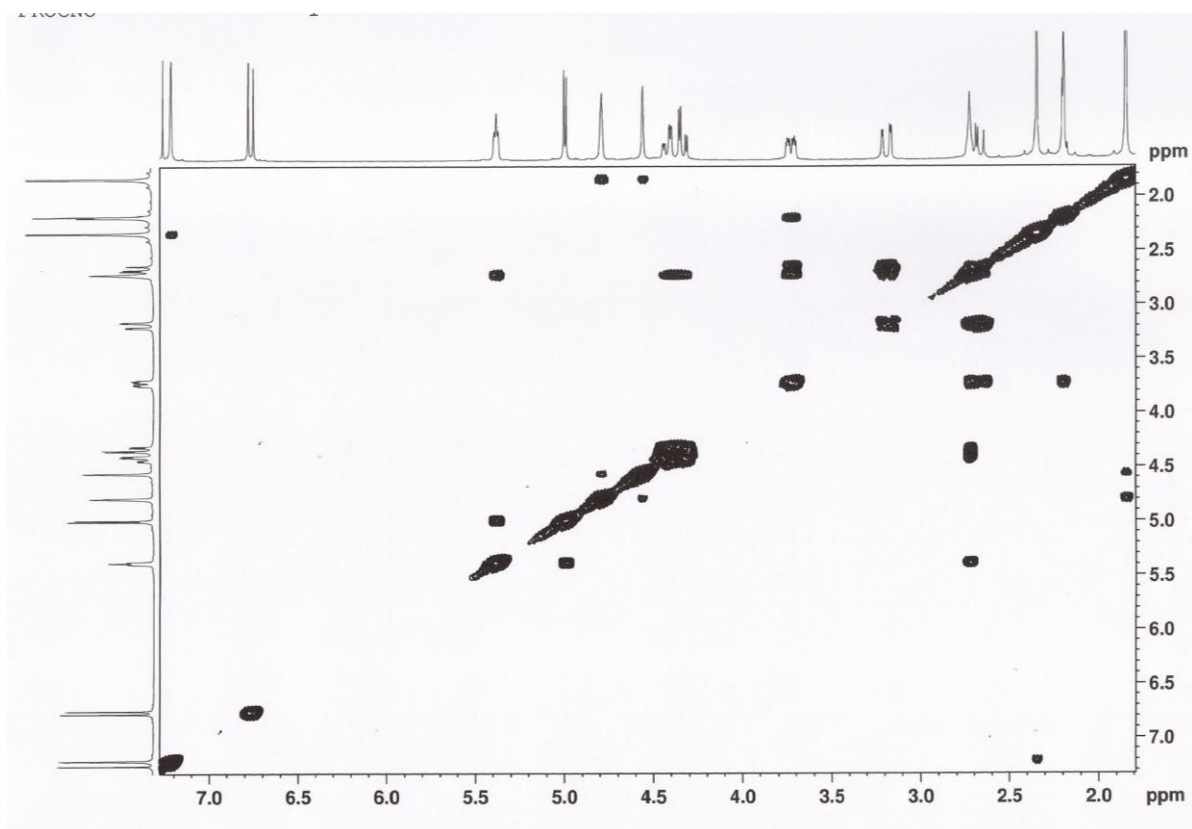

**Figure S50.** HSQC spectrum of **6a** (CDCl<sub>3</sub>, 300 MHz).

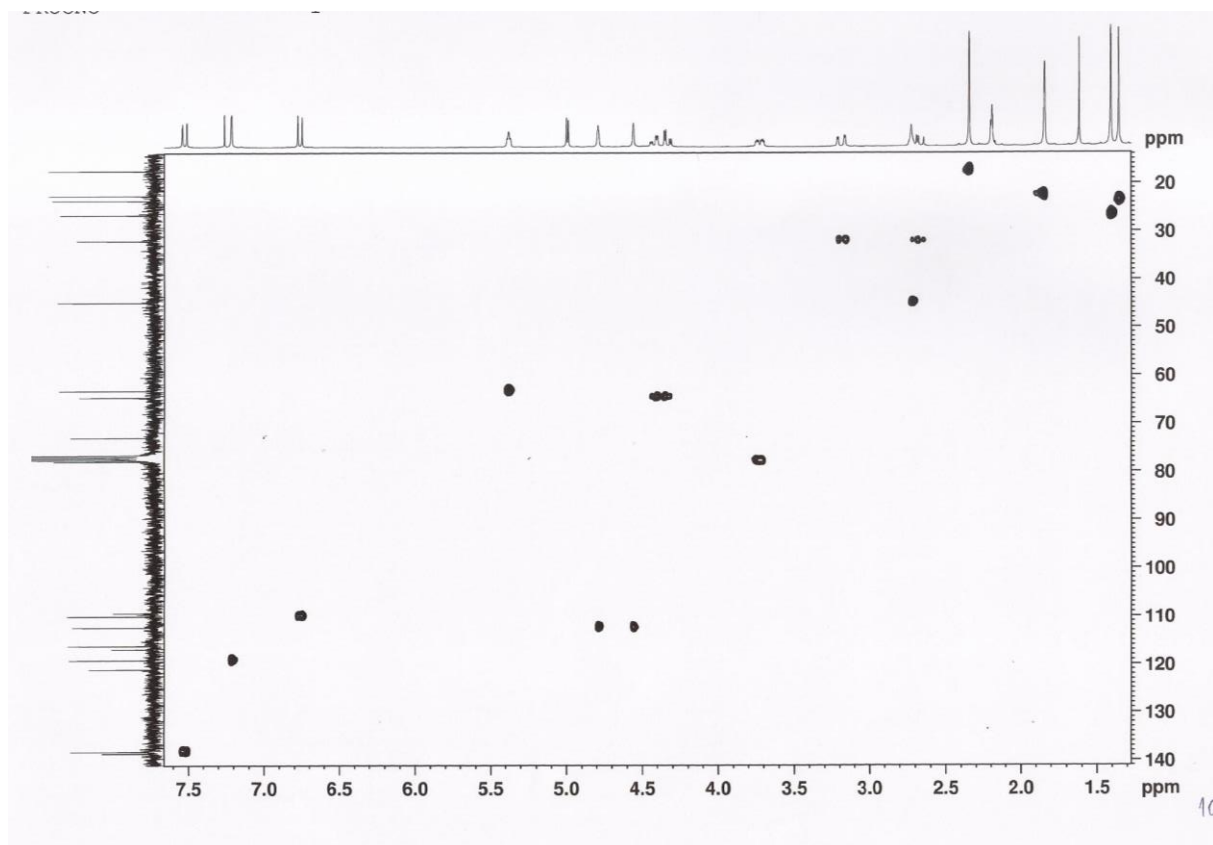

**Figure S51.** HMBC spectrum of **6a** (CDCl<sub>3</sub>, 300 MHz).

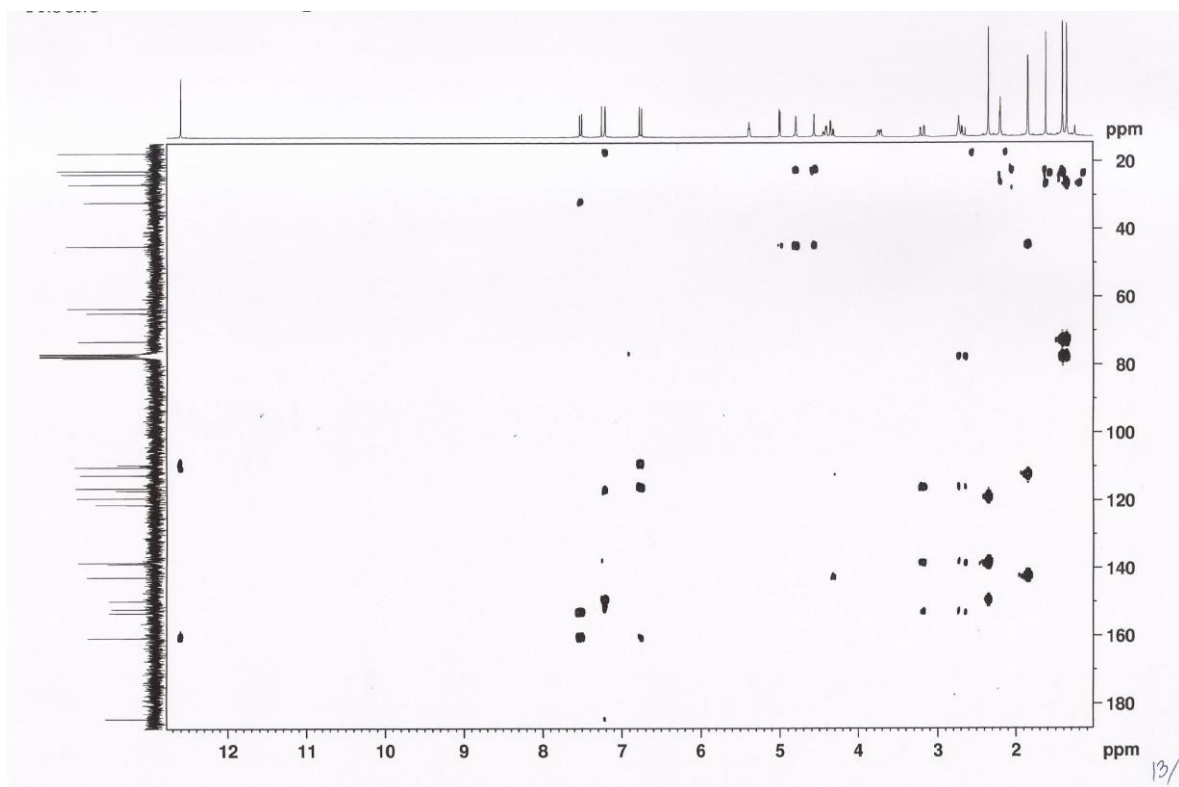

**Figure S52.** <sup>1</sup>H NMR spectrum of **6b** (CDCl<sub>3</sub>, 300 MHz).

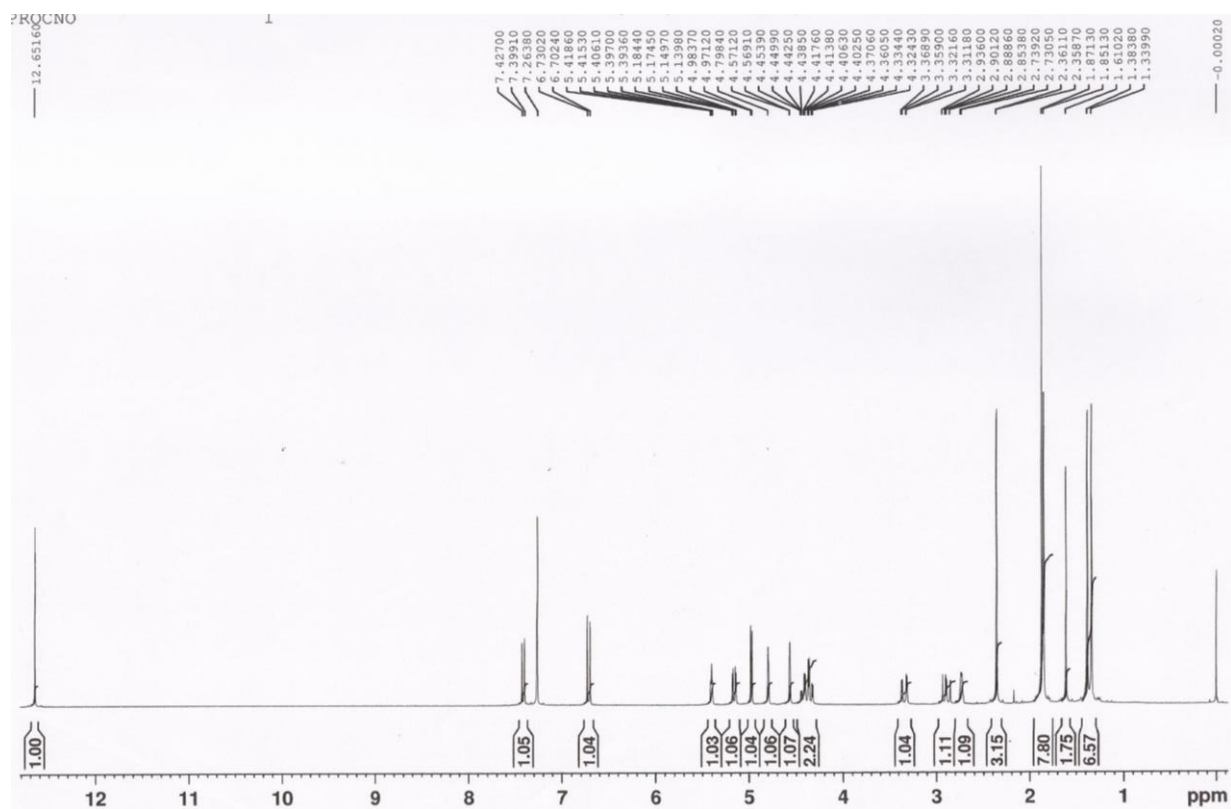

**Figure S53.**  $^{13}\text{C}$  NMR spectrum of **6b** ( $\text{CDCl}_3$ , 75 MHz).

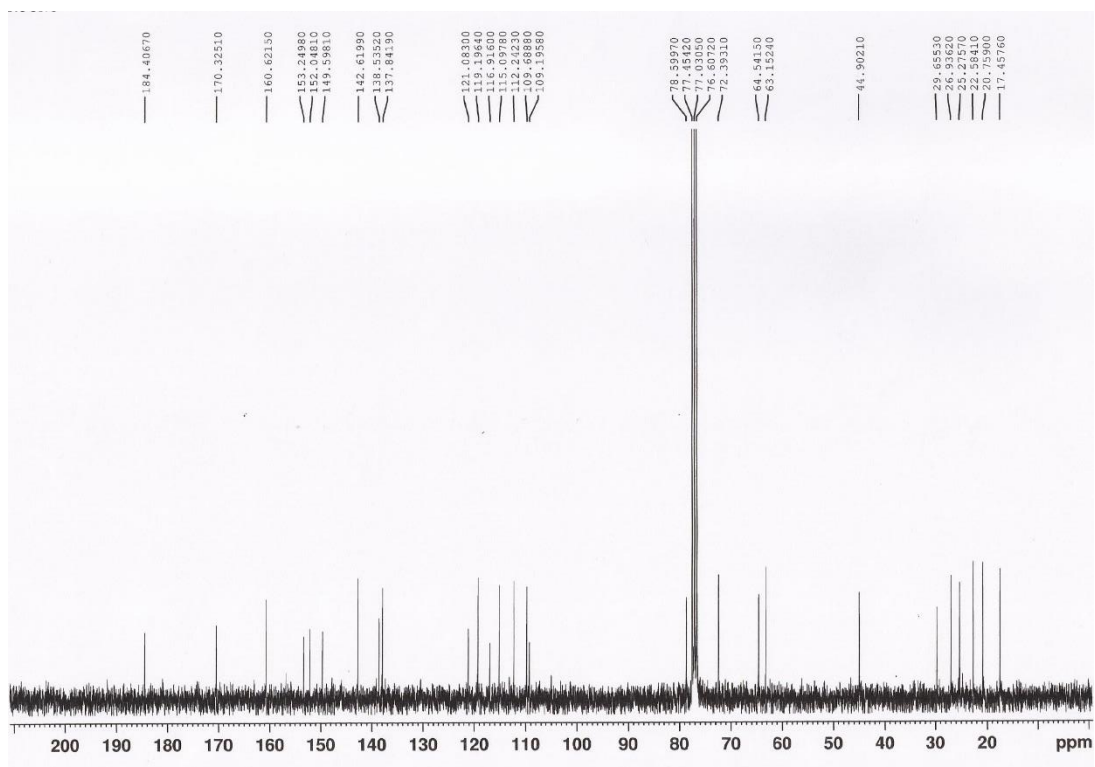

**Figure S54.** COSY spectrum of **6b** ( $\text{CDCl}_3$ , 300 MHz).

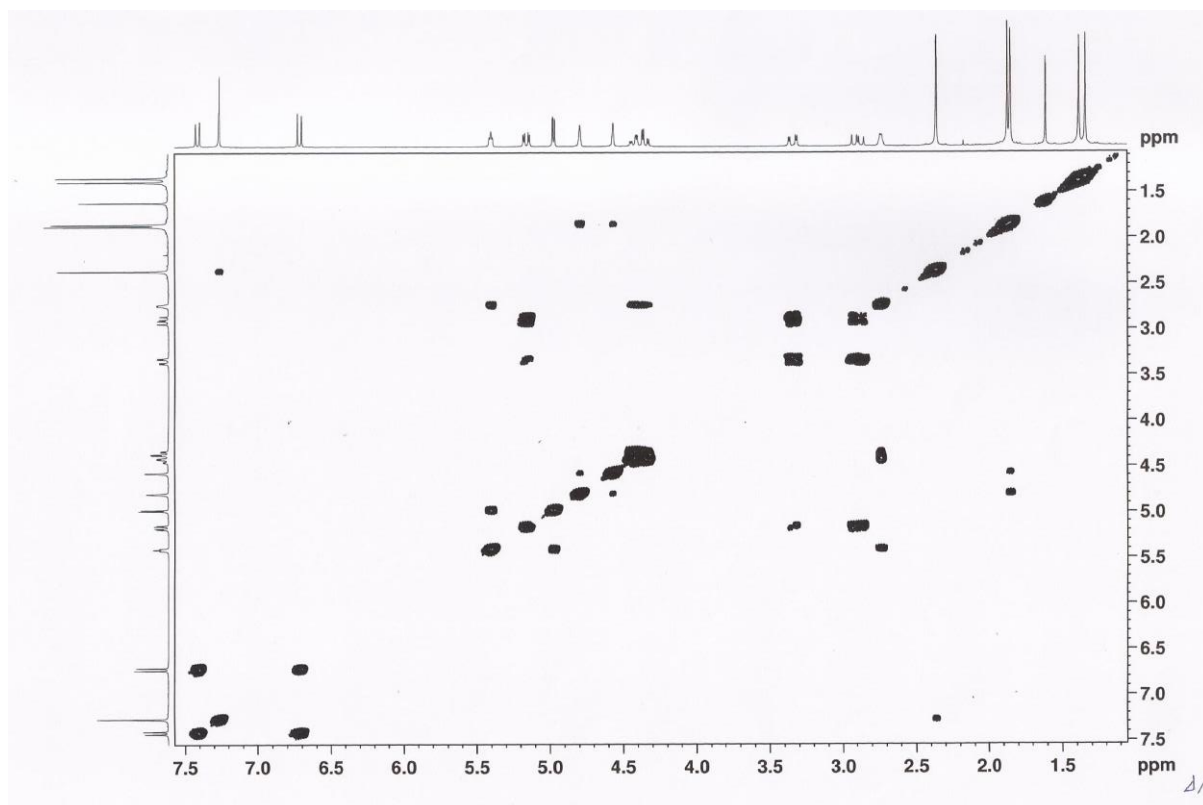

**Figure S55.** HSQC spectrum of **6b** (CDCl<sub>3</sub>, 300 MHz).

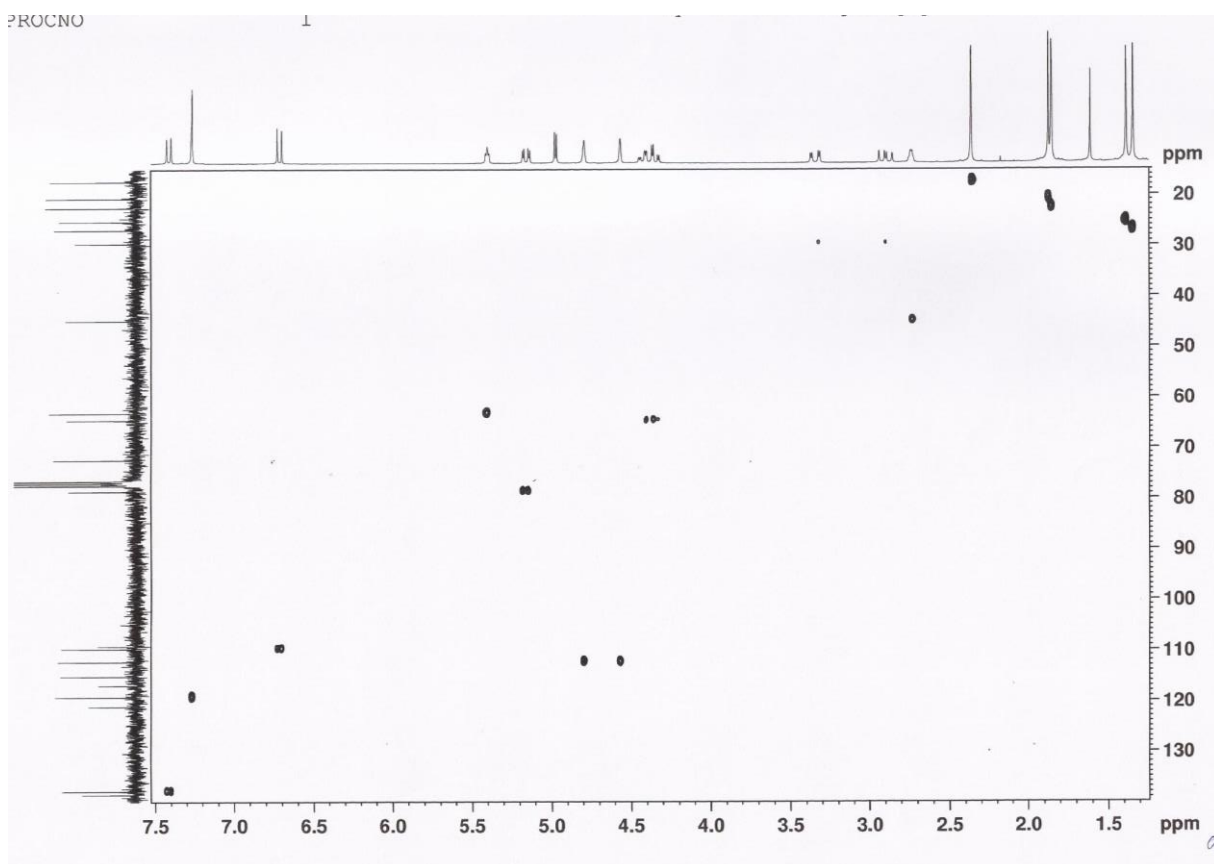

**Figure S56.** HMBC spectrum of **6b** (CDCl<sub>3</sub>, 300 MHz).

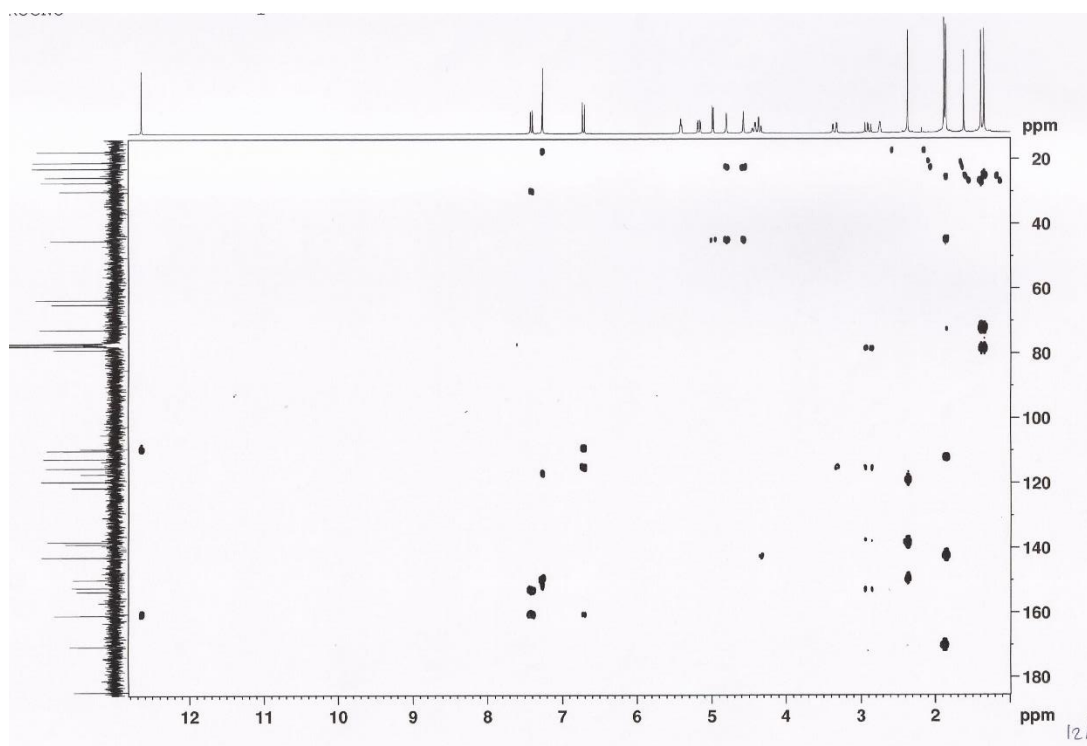

**Figure S57. (+)-HRESIMS of 2.**

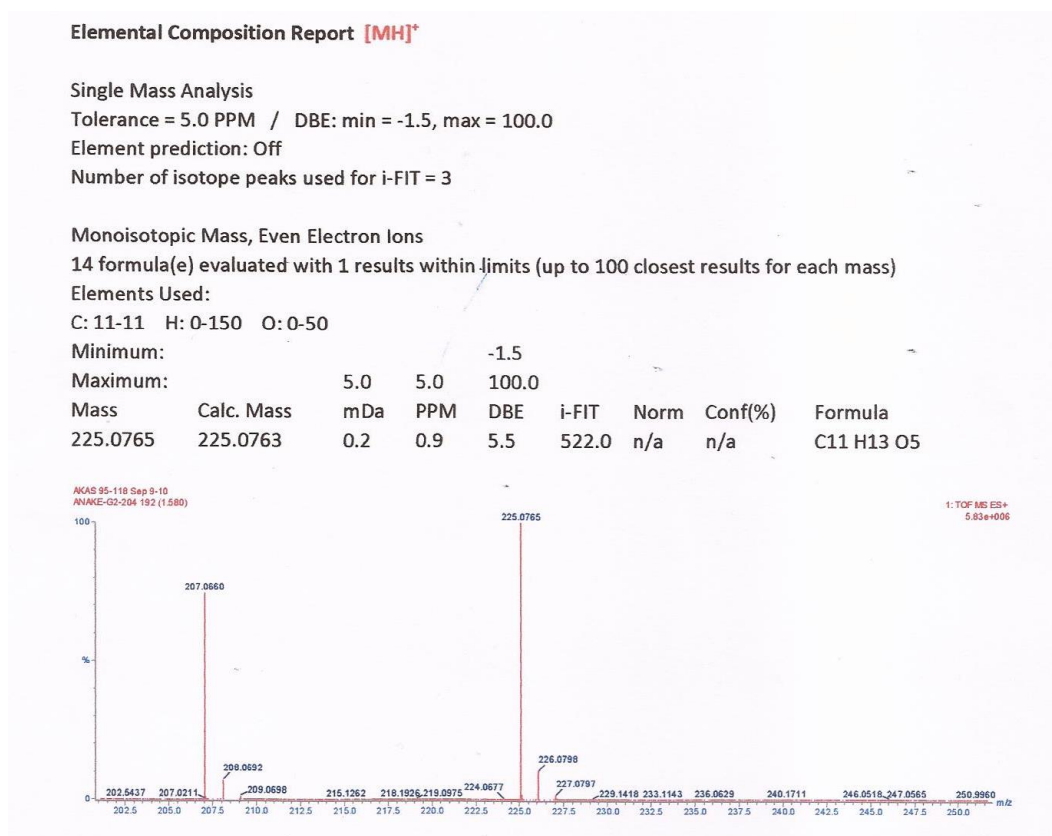

**Figure S58. (+)-HRESIMS of 4.**

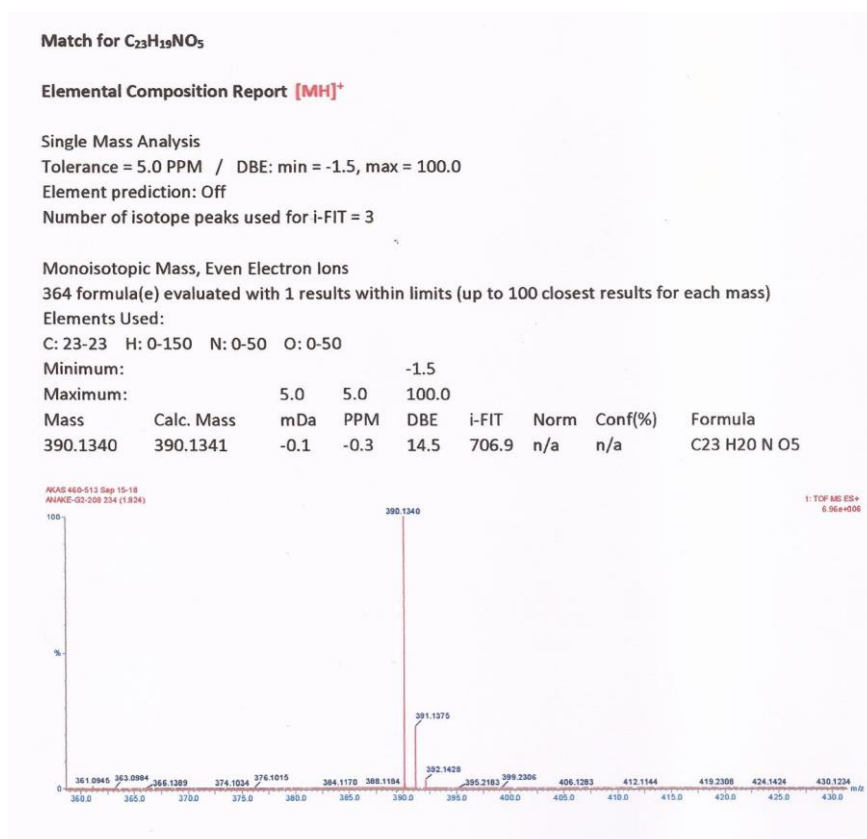



**Figure S59. (+)-HRESIMS of 5a.**

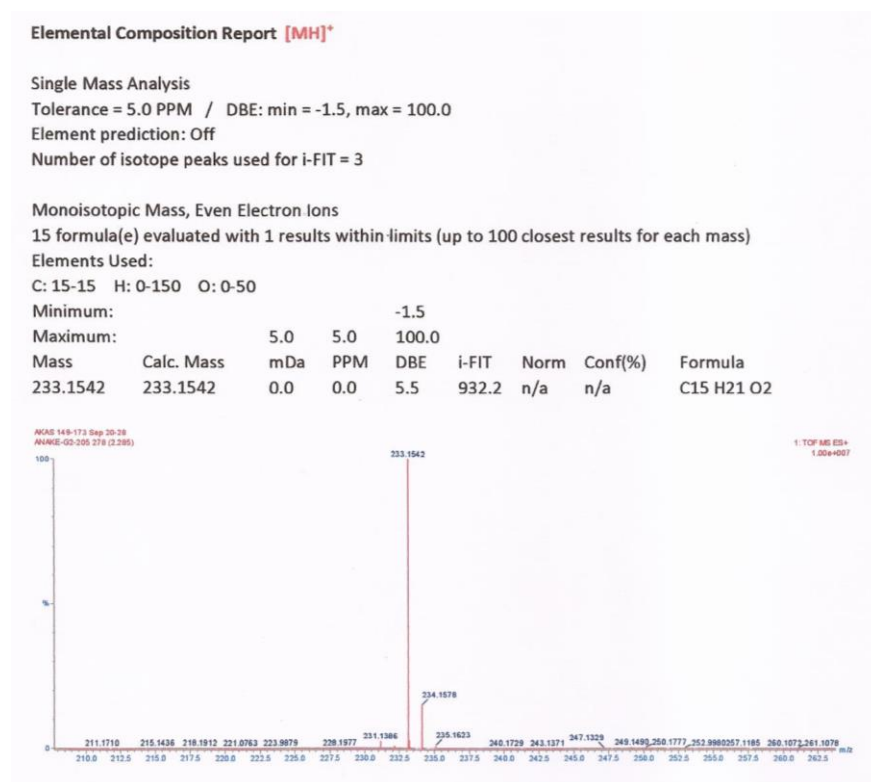

**Figure S60. (+)-HRESIMS of 5b.**

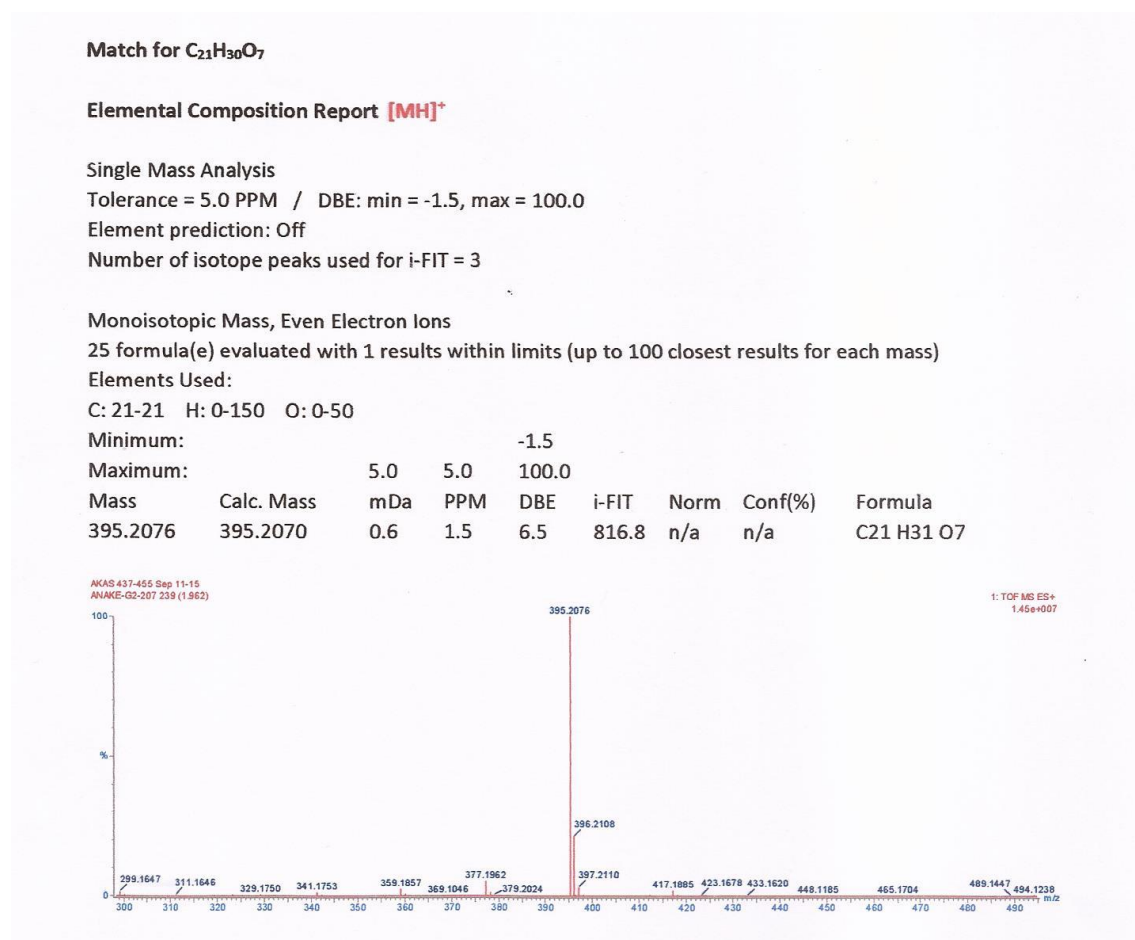

**Figure S61. (+)-HRESIMS of 5c.**

#### Elemental Composition Report [MH]<sup>+</sup>

Single Mass Analysis

Tolerance = 5.0 PPM / DBE: min = -1.5, max = 100.0

Element prediction: Off

Number of isotope peaks used for i-FIT = 3

Monoisotopic Mass, Odd and Even Electron Ions

28 formula(e) evaluated with 1 results within limits (up to 100 closest results for each mass)

Elements Used:

C: 23-23 H: 0-150 O: 0-50

Minimum: -1.5

Maximum: 5.0 5.0 100.0

| Mass     | Calc. Mass | mDa | PPM | DBE | i-FIT | Norm | Conf(%) | Formula                                        |
|----------|------------|-----|-----|-----|-------|------|---------|------------------------------------------------|
| 437.2175 | 437.2175   | 0.0 | 0.0 | 7.5 | 414.2 | n/a  | n/a     | C <sub>23</sub> H <sub>33</sub> O <sub>8</sub> |

#### Elemental Composition Report [MNa]<sup>+</sup>

Single Mass Analysis

Tolerance = 5.0 PPM / DBE: min = -1.5, max = 100.0

Element prediction: Off

Number of isotope peaks used for i-FIT = 3

Monoisotopic Mass, Odd and Even Electron Ions

57 formula(e) evaluated with 1 results within limits (up to 100 closest results for each mass)

Elements Used:

C: 23-23 H: 0-150 O: 0-50 Na: 0-1

Minimum: -1.5

Maximum: 5.0 5.0 100.0

| Mass     | Calc. Mass | mDa  | PPM  | DBE | i-FIT | Norm | Conf(%) | Formula                                           |
|----------|------------|------|------|-----|-------|------|---------|---------------------------------------------------|
| 459.1989 | 459.1995   | -0.6 | -1.3 | 7.5 | 629.7 | n/a  | n/a     | C <sub>23</sub> H <sub>32</sub> O <sub>8</sub> Na |

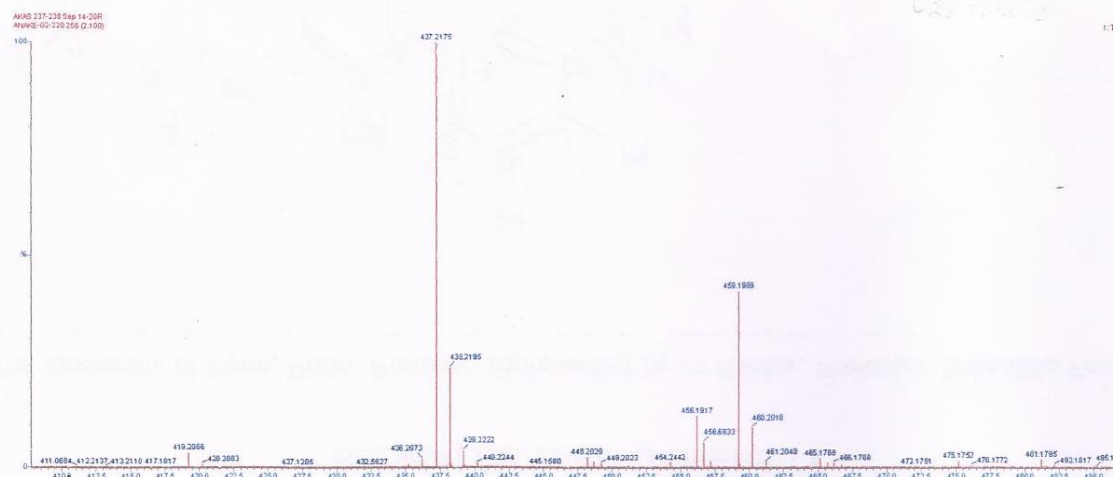



**Table S1.**  $^1\text{H}$  and  $^{13}\text{C}$  NMR data of **3a** and **3b** ( $\text{CDCl}_3$ , 300 and 75 MHz).

| <b>3a</b> |                            |                                    | <b>3b</b>                  |                                    |
|-----------|----------------------------|------------------------------------|----------------------------|------------------------------------|
| Position  | $\delta_{\text{C}}$ , type | $\delta_{\text{H}}$ , ( $J$ in Hz) | $\delta_{\text{C}}$ , type | $\delta_{\text{H}}$ , ( $J$ in Hz) |
| 1         | 165.3, C                   |                                    | 151.9, C                   |                                    |
| 2         | 104.7, CH                  | 6.78, d (2.3(                      | 144.9, C                   |                                    |
| 3         | 163.0, C                   |                                    | 147.7, C                   |                                    |
| 4         | 103.9, CH                  | 7.46, d (2.5)                      | 106.6, CH                  | 7.70, s                            |
| 4a        | 132.3, C                   |                                    | 127.8, C                   |                                    |
| 5         | 120.0, CH                  | 7.57, dd (1.7, 0.5)                | 120.2, CH                  | 7.59, dd (1.6, 0.5)                |
| 6         | 146.9, C                   |                                    | 147.7, C                   |                                    |
| 7         | 124.8, CH                  | 7.08, dd (1.6, 0.8)                | 124.3, CH                  | 7.08, dd (1.6, 0.8)                |
| 8         | 162.6, C                   |                                    | 162.6, C                   |                                    |
| 8a        | 114.8, C                   |                                    | 114.6, C                   |                                    |
| 9         | 187.5, CO                  |                                    | 187.6, CO                  |                                    |
| 9a        | 115.2, C                   |                                    | 120.2, C                   |                                    |
| 10        | 183.0, CO                  |                                    | 182.0, C                   |                                    |
| 10a       | 137.7, C                   |                                    | 132.5, C                   |                                    |
| Me-11     | 22.0, $\text{CH}_3$        | 2.43, s                            | 22.1, $\text{CH}_3$        | 2.44, s                            |
| OMe-1     | 56.1, $\text{CH}_3$        | 3.99, s                            | 61.9, $\text{CH}_3$        | 4.09, s                            |
| OMe-3     | 56.3, $\text{CH}_3$        | 4.03, s                            | 56.7, $\text{CH}_3$        | 4.03, s                            |
| OH-8      | -                          | 13.09, s                           |                            |                                    |

**Table S2.**  $^1\text{H}$  and  $^{13}\text{C}$  NMR data of **5b** (DMSO- $d_6$ , 300 and 75 MHz), **5c** (DMSO- $d_6$ , 500 and 125 MHz) and **5a** (CDCl $_3$ , 300 and 75 MHz).

| <b>5b</b>     |                            |                                              | <b>5c</b>                  |                                      | <b>5a</b>                  |                                    |
|---------------|----------------------------|----------------------------------------------|----------------------------|--------------------------------------|----------------------------|------------------------------------|
| Position      | $\delta_{\text{C}}$ , type | $\delta_{\text{H}}$ , ( $J$ in Hz)           | $\delta_{\text{C}}$ , type | $\delta_{\text{H}}$ , ( $J$ in Hz)   | $\delta_{\text{C}}$ , type | $\delta_{\text{H}}$ , ( $J$ in Hz) |
| 1             | 157.1, C                   |                                              | 157.3, HC                  |                                      | 156.4, C                   |                                    |
| 2             | 110.2, C                   |                                              | 109.9, C                   |                                      | 100.5, CH                  | 6.17, t (1.9)                      |
| 3             | 157.1, C                   |                                              | 157.3, C                   |                                      | 156.4, C                   |                                    |
| 4             | 107.6, CH                  | 6.11, s                                      | 107.5, CH                  | 6.11, s                              | 108.2, CH                  | 6.24, d (2.1)                      |
| 5             | 142.5, C                   |                                              | 142.5, C                   |                                      | 145.3, C                   |                                    |
| 6             | 107.6, CH                  | 6.11, s                                      | 107.5, CH                  | 6.11, s                              | 108.2, CH                  | 6.24, d (2.1)                      |
| 7             | 35.5, CH $_2$              | 2.45, t (6.8)                                | 35.5, CH $_2$              | 2.44 t (7.2)                         | 35.7, CH $_2$              | 2.50, dd (9.1, 7.1)                |
| 8             | 34.0, CH $_2$              | 2.27, dd (14.3, 6.6)                         | 34.0, CH $_2$              | 2.26, dd (14.7, 7.2)                 | 34.7, CH $_2$              | 2.02, dd (14.4, 7.2)               |
| 9             | 131.8, CH                  | 5.58, m                                      | 131.8, CH                  | 5.59 ddd (14.6, 7.2, 7.2)            | 131.0, CH                  | 5.55, m                            |
| 10            | 130.9, CH                  | 5.97, m                                      | 130.9, CH                  | 5.97, m                              | 130.3, CH                  | 5.96, m                            |
| 11            | 131.1, CH                  | 6.04, m                                      | 131.1, CH                  | 6.04, m                              | 130.9, CH                  | 6.02, m                            |
| 12            | 132.6, CH                  | 5.58, m                                      | 132.6, CH                  | 5.57 ddd (14.5, 7.7, 7.1)            | 133.0, CH                  | 5.58, m                            |
| 13            | 34.5, CH $_2$              | 2.00, dd (14.3, 7.2)                         | 34.5, CH $_2$              | 2.01, m                              | 34.0, CH $_2$              | 2.26, dd (15.3, 7.0)               |
| 14            | 22.5, CH $_2$              | 1.36, sex (7.2)                              | 22.5, C                    | 1.36, sex (7.4)                      | 22.5, CH $_2$              | 1.40, sex (7.4)                    |
| 15            | 14.0, CH $_3$              | 0.87, t (7.2)                                | 14.0, CH $_3$              | 0.86, t (7.4)                        | 13.8, CH $_3$              | 0.89, t (7.4)                      |
| 1'            | 75.0, CH                   | 4.62, d (9.6)                                | 74.9, CH                   | 4.60, d (9.8)                        |                            |                                    |
| 2'            | 72.1, CH                   | 3.74, m                                      | 71.5, CH                   | 3.83, t (9.2)                        |                            |                                    |
| 3'            | 79.1, CH                   | 3.22, m                                      | 79.0, CH                   | 3.21, t (8.7)                        |                            |                                    |
| 4'            | 70.3, CH                   | 3.22, m                                      | 70.6, CH                   | 3.18, t (8.7)                        |                            |                                    |
| 5'            | 81.5, CH                   | 3.20, m                                      | 78.4, CH                   | 3.36 (under water peak)              |                            |                                    |
| 6'            | 61.2, CH $_2$              | 3.50, dd (11.0, 5.5)<br>3.65, dd (11.0, 5.2) | 64.8, CH $_2$              | 4.32 d (11.6)<br>3.98 dd (11.6, 3.9) |                            |                                    |
| CO (OAc)      |                            |                                              | 170.9 CO                   | -                                    |                            |                                    |
| CH $_3$ (OAc) |                            |                                              | 21.2, CH $_3$              | 2.00, s                              |                            |                                    |
| OH-3          |                            | 8.67, s                                      |                            | 8.74, brs                            |                            |                                    |
| OH-3'         |                            |                                              |                            | 4.95, br                             |                            |                                    |
| OH-4'         |                            | 4.90, dd (10.7, 2.9)                         |                            | 5.15, br                             |                            |                                    |
| OH-6'         |                            | 4.59, d (5.5)                                |                            |                                      |                            |                                    |

**Table S3.**  $^1\text{H}$  and  $^{13}\text{C}$  NMR data of **6a** and **6b** ( $\text{CDCl}_3$ , 300 and 75 MHz).

| <b>6a</b>             |                            |                                               | <b>6b</b>                  |                                                    |
|-----------------------|----------------------------|-----------------------------------------------|----------------------------|----------------------------------------------------|
| Position              | $\delta_{\text{C}}$ , type | $\delta_{\text{H}}$ , ( <i>J</i> in Hz)       | $\delta_{\text{C}}$ , type | $\delta_{\text{H}}$ , ( <i>J</i> in Hz)            |
| 1                     | 160.5, C                   |                                               | 160.6, C                   |                                                    |
| 2                     | 110.0, CH                  | 6.77, d (8.4)                                 | 109.7, CH                  | 6.72, d (8.3)                                      |
| 3                     | 138.2, CH                  | 7.53, d (8.4)                                 | 138.7, CH                  | 7.41, d (8.3)                                      |
| 4                     | 116.2, C-4                 |                                               | 115.1, C                   |                                                    |
| 5                     | 119.1, CH                  | 7.22, d (0.7)                                 | 119.2, CH                  | 7.26, s                                            |
| 6                     | 138.6, C                   |                                               | 138.5, C                   |                                                    |
| 7                     | 149.6, C                   |                                               | 149.6, C                   |                                                    |
| 8                     | 121.0, C                   |                                               | 121.1, C                   |                                                    |
| 9                     | 109.3, C-9                 |                                               | 109.2, C                   |                                                    |
| 10                    | 153.1, C                   |                                               | 153.2, C                   |                                                    |
| 11                    | 152.0, C                   |                                               | 152.0, C                   |                                                    |
| 12                    | 116.9, C-12                |                                               | 116.9, C                   |                                                    |
| 13                    | 184.4, CO                  |                                               | 184.4, CO                  |                                                    |
| 14                    | 31.9, CH <sub>2</sub>      | 2.68, dd (14.1, 10.6)<br>3.19, dd (14.0, 2.0) | 29.7, CH <sub>2</sub>      | 2.88, dd (14.2, 10.4)<br>3.34, dd (14.2, 3.0)      |
| 15                    | 77.8, CH                   | 3.73, ddd (10.4, 3.9, 2.1)                    | 78.6, CH                   | 5.18, dd (10.4, 3.2)                               |
| 16                    | 72.9, C                    |                                               | 72.4, C                    |                                                    |
| 17                    | 26.6, CH <sub>3</sub>      | 1.41, s                                       | 26.9, CH <sub>3</sub>      | 1.34, s                                            |
| 18                    | 23.6, CH <sub>3</sub>      | 1.35, s                                       | 25.3, CH <sub>3</sub>      | 1.38, s                                            |
| 19                    | 64.6, CH <sub>2</sub>      | 4.34, dd (10.9, 3.0)<br>4.43, dd (10.8, 3.5)  | 64.5, CH <sub>2</sub>      | 4.35, dd (11.0, 3.0)<br>4.43, ddd (11.0, 3.4, 1.2) |
| 20                    | 44.9, CH                   | 2.71, brs                                     | 44.9, CH                   | 2.73, brd (2.6)                                    |
| 21                    | 142.5, C                   |                                               | 142.6, C                   |                                                    |
| 22                    | 112.3, CH <sub>2</sub>     | 4.79, s<br>4.56, brd (0.6)                    | 112.2, CH <sub>2</sub>     | 4.57, brd (0.6)<br>4.80, brs                       |
| 23                    | 22.6, CH <sub>3</sub>      | 1.84, s                                       | 22.6, CH <sub>3</sub>      | 1.85, s                                            |
| 24                    | 17.4, CH <sub>3</sub>      | 2.34, d (0.7)                                 | 17.4, CH <sub>3</sub>      | 2.36, d (0.7)                                      |
| 25                    | 63.2, CH                   | 5.38, m                                       | 63.2, CH                   | 5.41, m                                            |
| CO (OAc)-15           |                            |                                               | 170.3, CO                  |                                                    |
| CH <sub>3</sub> (OAc) |                            |                                               | 20.8, CH <sub>3</sub>      | 1.87, s                                            |
| OH-1                  |                            | 12.61, s                                      |                            | 12.65, s                                           |
| OH-15                 |                            | 2.20, d (2.4)                                 |                            |                                                    |
| OH-25                 |                            | 5.00, d (3.8)                                 |                            | 4.98, d (3.8)                                      |
